# RNA splicing analysis using heterogeneous and large RNA-seq datasets

Jorge Vaquero-Garcia<sup>1, 5</sup>, Joseph K. Aicher<sup>1, 4, 5</sup>, Paul Jewell<sup>1, 5</sup>, Matthew R. Gazzara<sup>1, 5</sup>, Caleb M. Radens<sup>1, 6</sup>, Anupama Jha<sup>2, 6</sup>, Christopher J. Green<sup>1</sup>, Scott S. Norton<sup>1</sup>, Nicholas F. Lahens<sup>3</sup>, Gregory R. Grant<sup>1</sup>, and Yoseph Barash<sup>1, 2, 7</sup>

<sup>1</sup>Department of Genetics, University of Pennsylvania

<sup>2</sup>Department of Computer and Information Science, University of Pennsylvania

<sup>3</sup>Institute for Translational Medicine and Therapeutics, University of Pennsylvania

<sup>4</sup>Division of Human Genetics, Children's Hospital of Philadelphia

<sup>5</sup>Equal contribution as co-first authors

<sup>6</sup>Equal contribution

<sup>7</sup>To whom correspondence should be addressed

## Abstract

The ubiquity of RNA-seq has led to many methods that use RNA-seq data to analyze variations in RNA splicing. However, available methods are not well suited for handling heterogeneous and large datasets. Such datasets scale to thousands of samples across dozens of experimental conditions, exhibit increased variability compared to biological replicates, and involve thousands of unannotated splice variants resulting in increased transcriptome complexity. We describe here a suite of algorithms and tools implemented in the MAJIQ v2 package to address challenges in detection, quantification, and visualization of splicing variations from such datasets. Using both large scale synthetic data and GTEx v8 as benchmark datasets, we demonstrate that the approaches in MAJIQ v2 outperform existing methods. We then apply MAJIQ v2 package to analyze differential splicing across 2,335 samples from 13 brain subregions, demonstrating its ability to offer new insights into brain subregion-specific splicing regulation.

## 25 Introduction

26 The usage of RNA sequencing (RNA-seq) has become ubiquitous in biomedical research. While some  
27 studies utilize RNA-seq only to investigate the overall expression level of genes, an increasing number  
28 of studies analyze changes in the relative abundance of gene isoforms. Changes in gene isoforms can  
29 occur through multiple mechanisms, including alternative promoter usage, alternative polyadenylation,  
30 and alternative splicing (AS). The production of different gene isoforms can in turn lead to diverse  
31 functional consequences, including changes to the translated protein domains, to degradation rates,  
32 and to localization. Previous studies showed that the majority of human genes are alternatively spliced  
33 with over a third of them shown to change their major isoform across 16 human tissues[1]. These  
34 observations, combined with the association of splicing defects with both monogenic and complex  
35 disease, serve to motivate the study of splicing variations across diverse experimental conditions.  
36 Consequently, independent labs as well as large consortia produce vast amounts of RNA-seq data.  
37 Datasets may involve anywhere from just a few to many thousands of samples each, and are typically  
38 heterogeneous as they often do not represent biological or technical replicates. The consequent  
39 increased splicing variability, illustrated in Fig 1A,B, can be the result of a multitude of factors, both  
40 experimental (e.g. difference in sequencing machine), and biological (e.g. gender, age). While some  
41 confounding factors may be corrected with appropriate methods[2], fully removing the observed  
42 variability in such data is unlikely and may also over-constrain the data, thus leading to a loss of true  
43 biological signal. Thus, there is a general need for methods that can effectively detect, quantify, and  
44 visualize splicing variations from large and heterogeneous RNA-seq datasets.

45 Broadly, the quantification of changes in gene isoform usage can be divided between methods  
46 that aim to quantify whole isoforms and those that quantify more local AS “events” within a gene.  
47 While quantifying all gene isoforms accurately across diverse conditions can be regarded as the grand  
48 challenge of transcriptomics, achieving this goal remains open due to several limiting factors. In the  
49 case of long reads technology, these factors include high error rate and high costs which do not allow  
50 researchers to capture enough reads from all isoforms. In the case of the more commonly used short  
51 reads technology, these limiting factors include the sparsity of reads, their positional bias, and the fact  
52 that reads usually cannot be assigned to a unique isoform. In addition, the composition of isoforms in  
53 a sample is typically unknown, requiring further inference of the existing isoforms or making

54 simplifying assumptions such as a known transcriptome. These issues have led many researchers to  
55 focus on local AS “events” which can be more easily and accurately quantified from RNA-seq. AS  
56 events are quantified in terms of percent spliced in (PSI, denoted by  $\Psi$ ), which is the relative ratio of  
57 isoforms including a specific splicing junction or retained intron. Traditionally, AS events have been  
58 studied only for a restricted set of the most common “types” (e.g. cassette exons). In a previous  
59 study, we extended this set of AS event types using the formulation of local splicing variations (LSVs)  
60 and introduced MAJIQ as a software package for studying such LSVs. LSVs, which can be defined as  
61 splits in a gene splicegraph coming into or from a reference exon, allow researchers to capture not only  
62 previously defined AS types but also much more complex variations involving more than two  
63 alternative junctions (see examples in Figure 1C for illustration). Furthermore, the LSV formulation,  
64 and similar definitions of local AS events suggested in subsequent works, also help incorporate and  
65 quantify unannotated (*de novo*) splice junctions. Previous work comparing splicing across mouse  
66 tissues has shown that accounting for complex and *de novo* variations results in over 30% increase of  
67 detected differentially spliced events while maintaining the same level of reproducibility [3].  
68 Importantly, capturing such unannotated splice variations is of particular importance for the study of  
69 disease such as cancer and neurodegeneration which often involve aberrant splicing.

70 Despite previous demonstrations of MAJIQ’s utility for analyzing AS[3, 4], we found it as well  
71 as many other commonly used methods for AS events quantification not to be well-suited for handling  
72 heterogeneous and large RNA-seq datasets. Such datasets pose several algorithmic, computational,  
73 and visualization challenges. First, the assumption of a shared PSI per LSV junction in a group, used  
74 by methods such as MAJIQ and LeafCutter, is violated in such data even when handling only a small  
75 dataset with few samples, leading to a potential increase in false positives and loss of power. Second,  
76 algorithms need to not only scale to thousands of samples efficiently but also to allow incrementally  
77 adding new samples as more data is acquired, and to support multiple group comparisons (e.g.  
78 multiple tissue comparisons across GTEx). Third, the increased complexity of the data requires  
79 efficient representation. Such efficient representation would allow users to capture the many  
80 unannotated splicing variations in the data, while at the same time simplifying its representation and  
81 quantification. Such simplification will allow to filter lowly used splice junctions while also detecting  
82 possibly new sub-types of significant variations. Finally, efficient and user-friendly visualization is  
83 required to probe possibly multiple sample groups as well as individual samples.

84 To address the above challenges, we developed an array of tools and algorithms included in the  
85 MAJIQ v2 package. These include nonparametric statistical tests for differential splicing (MAJIQ  
86 HET), an incremental splicegraph builder, a new algorithm for quantifying intron retention, a method  
87 to detect high-confidence negative (non-changing) splicing events, and an algorithm to parse all LSVs  
88 across genes into modules which can then be classified into subtypes (Modulizer). These algorithms  
89 and tools are coupled with a new visualization package (VOILA v2) which allows users to compare  
90 multiple sample groups, simplify splicegraphs, and probe individual data points (e.g. LSV in an  
91 individual sample) while representing hundreds or thousands of samples. In addition, to support  
92 reproducibility, we develop a package for comparative evaluation of different methods for RNA splicing  
93 analysis and use it to demonstrate that the new version of MAJIQ compares favorably with the current  
94 state of the art using both synthetic (simulated) and real (GTEx) data. Finally, we apply the MAJIQ  
95 v2 toolset to 2,335 RNA-seq samples from 374 donors across 13 brain subregions. We use VOILA v2  
96 to visualize the result and highlight several key findings in brain subregions specific variations in  
97 cerebellar tissue groups compared to the remaining brain regions.

## 98 **Results**

### 99 **The MAJIQ v2 splicing analysis pipeline**

100 To support RNA splicing analysis using large RNA-seq datasets we implemented the set of tools and  
101 algorithms illustrated in Figure 1C. In the first step, the MAJIQ builder combines transcript  
102 annotations and coverage from aligned RNA-seq experiments in order to build an updated splicegraph  
103 for each gene which includes *de novo* (unannotated) elements such as junctions, retained introns, and  
104 exons). Several user-defined filters can be applied at this stage to exclude junctions or retained introns  
105 which have low coverage or are not detected in enough samples in user-defined sample groups.  
106 Notably, per-experiment coverage is saved separately so that it can be used in subsequent analyses  
107 without reprocessing aligned reads a second time (aka incremental build). This feature is highly  
108 relevant for large studies with incremental releases such as ENCODE and GTEx and also for individual  
109 lab projects where datasets or samples are added as the project evolves.

110 In the second step of the pipeline, the MAJIQ quantifier is executed. As in the original MAJIQ  
111 framework, splicing quantification is performed in units of LSVs. Briefly, an LSV corresponds to a split

112 in gene splicegraphs coming into or out of a reference exon. Each LSV edge, corresponding to a splice  
113 junction or intron retention, is quantified in terms of its relative inclusion ( $\text{PSI}, \Psi \in [0, 1]$ ) or changes  
114 in its relative inclusion between two conditions ( $\text{dPSI}, \Delta\Psi \in [-1, 1]$ ). Given the junction spanning  
115 reads observed in each LSV, MAJIQ's Bayesian model results in a posterior distributions over the  
116 (unknown) inclusion level ( $\mathbb{P}(\Psi)$ ), or the changes in inclusion levels between conditions ( $\mathbb{P}(\Delta\Psi)$ ).  
117 This model accounts not only for the total number of reads but also for factors such as read  
118 distribution across genomic locations and read stacks. Given its Bayesian framework, the model can  
119 also output the confidence in inclusion change of at least  $C$  ( $\mathbb{P}(|\Delta\Psi| > C)$ ), or the expectation over  
120 the computed posterior distributions ( $\mathbb{E}[\Psi], \mathbb{E}[\Delta\Psi]$ ). In this work, we introduce two new algorithms  
121 within the MAJIQ quantifier. The first involves how intron retention is quantified, allowing for much  
122 faster execution with higher accuracy (see Methods). The second addition is the implementation of  
123 additional test statistics, termed MAJIQ HET (heterogeneous). Conceptually, the original MAJIQ  
124 model assumes a shared (hidden) PSI value for a given group of samples and accumulates evidence  
125 (reads) across these samples to infer PSI. In contrast, MAJIQ HET quantifies PSI for each sample  
126 separately and then applies robust rank-based test statistics (TNOM, InfoScore, or Mann-Whitney U).  
127 As we demonstrate below, the new HET test statistics allow MAJIQ to increase reproducibility in small  
128 heterogeneous datasets, and gain power in large heterogeneous datasets.

129 A new optional analysis step introduced here is the VOILA Modulizer, an algorithm which  
130 organizes all identified LSVs into AS modules and then groups these modules by type. Briefly, AS  
131 modules represent distinct segments of a gene splicegraph involving overlapping LSVs which are  
132 contained between a single source and single target exon. However, unlike DiffSplice's AS modules[5],  
133 we do not use a recursive definition of these modules and instead classify all identified modules by  
134 their substructures into types. The module's substructures are in turn defined by the basic units of  
135 alternative splicing, namely intron retention, exon skipping and 3' or 5' splice variations. As we  
136 demonstrate below, the automatic AS module classification greatly facilitates a wide range of  
137 downstream analysis tasks.

138 The next step of the pipeline involves visualization of the quantified PSI and dPSI using VOILA  
139 v2. This new package runs as an app (on macOS, Windows, Linux) which supports the visualization of  
140 thousands of samples per LSV as violin beeswarm plots with multi group comparisons and advanced  
141 user filters. Users can perform searches by gene name or junction, and simplify the visualization by

142 filtering out lowly included junctions. This option is highly relevant for large heterogeneous datasets  
143 where many junctions might be captured but may not be relevant for specific comparisons/samples.  
144 Notably, unlike the builder filters described above, the VOILA v2 filters do not affect the underlying  
145 splicegraphs but only help declutter the visualization to aid in subsequent analysis. VOILA v2 has the  
146 option to run as a server to share results with collaborators while all of the pipeline's results can also  
147 be exported into other pipelines as tab-delimited files and for automated primer design for validation  
148 using MAJIQ-SPEL[6].

### 149 **Performance evaluation**

150 In order to assess MAJIQ HET, our new method for detecting differential splicing, we performed a  
151 comprehensive comparison to an array of commonly used algorithms using both synthetic and real  
152 data. We considered only algorithms capable of analyzing large datasets, including the original MAJIQ  
153 algorithm (upgraded with the v2 code-base to enable efficient data processing), rMATS turbo,  
154 LeafCutter, SUPPA2, and Whippet. Figure 2A shows processing time and memory when performing a  
155 multi-group, multi-sample comparison, typical for such datasets. In this case, we perform all pairwise  
156 comparisons between 10 tissue groups, and the number of samples in each group grows from 1 (10  
157 total samples) to 6 (60 total samples). All algorithms are able to process such large datasets using  
158 only 0.5-4 GB of memory, an amount readily available on modern laptops. However, large differences  
159 exist in terms of running time, with SUPPA2 (55 hours) and Whippet (50 hours) taking substantially  
160 longer to analyze the larger dataset (6 samples per group, 60 total samples) compared to  
161 approximately 6 hours by rMATS, LeafCutter and MAJIQ v2.

162 Next, we assessed the accuracy of all algorithms using a large-scale synthetic dataset for  
163 comparing two tissue groups. This synthetic dataset, by far the largest of its kind to the best of our  
164 knowledge, was constructed to be "realistic" such that each synthetic sample was generated to mimic  
165 a real GTEx sample from either cerebellum or smooth muscle tissues (see Methods). All methods were  
166 required to report changing AS events which pass the method's statistical significance test and  
167 inferred to exhibit a substantial splicing change of at least 20% (see Methods). However, we note that  
168 since the various algorithms use significantly different definitions of AS events it is hard to compare  
169 those directly. For example, LeafCutter defines AS events as clusters of overlapping introns which may  
170 involve multiple 3'/5' alternative splice sites and skipped exons, while rMATS is limited to only

171 classical AS events with two alternative junctions. Thus, to facilitate a comparative analysis, we  
172 resorted to comparing the various algorithms output at the gene rather than event level using the  
173 synthetic dataset shown in Fig. 2B. A more refined analysis at the AS event level for each method can  
174 be found in Fig. S1 and follows the same trends discussed here at the gene level. First, we found  
175 SUPPA2 consistently reported over 6,000 differentially spliced genes, thousands more than any other  
176 method, while Whippet reported roughly 785 genes, significantly less than the other methods which  
177 reported over 2,000 changing genes (Fig. 2B top bar chart). Whippet, followed by rMATS, reported  
178 significantly more non-changing events. SUPPA2, rMATS, and Whippet all exhibited high FDR  
179 ranging around 15-30%, with the former two also exhibiting high FNR over 40%. Both MAJIQ and  
180 MAJIQ HET consistently maintained a lower false discovery rate compared to other algorithms (0.3%)  
181 and a low level of false negative rate which was similar to that of LeafCutter. On small sets, for  
182 example when using 5 samples per group, LeafCutter had a slightly lower FNR (2.5% vs 5.5% for  
183 HET), but MAJIQ exhibited lower FDR (0.03% vs 0.8%) while still reporting overall 34% more genes  
184 as changing (2,337 vs 1,739) and 6% more as non-changing (7,110 vs 6,713). It is also worth noting  
185 that the actual difference in the number of changing AS events reported by MAJIQ and LeafCutter is  
186 significantly higher, with 4,267 reported by MAJIQ vs. 2,169 by LeafCutter. This increased difference  
187 is mainly due to the increased resolution of event definition by MAJIQ. Specifically, MAJIQ uses the  
188 local splice variations formulation described above, while LeafCutter uses a definition of overlapping  
189 intronic regions which give rise to coarser event definition and can be sensitive to the coverage  
190 threshold used.

191 The significant differences between the methods described above raises the question how the  
192 reported sets of differentially spliced genes overlap. Fig. 2C illustrates the result of such analysis when  
193 using 10 samples per group. Here, we looked at the intersection between different methods at the  
194 gene level and when a set was unique to a method (i.e. the underlying events are well defined) we also  
195 estimated the associated FPR. We found SUPPA2 reports a significantly higher number of unique  
196 genes (1,777) as differentially spliced but over a quarter of those are false positives. The next set sizes  
197 are those for LeafCutter (333), HET and SUPPA2 (288), HET (230), and MAJIQ HET and PSI (214)  
198 with a FPR of 4% for the LeafCutter's unique set and close to 0 FPR for both MAJIQ's algorithms  
199 unique sets. rMATS and Whippet report significantly fewer unique genes with a high false positive  
200 rate of 62% and 79% respectively.

201           Next, we turned to assess performance on real GTEx data using several metrics. Here, unlike  
202 the synthetic data analysis which focused on comparative evaluation at the gene level, we focus on the  
203 actual AS events reported by each method. First, we used the reproducibility ratio (RR) statistic as  
204 shown in Figure 2D. The RR plots follow a similar procedure to that of irreproducible discovery rate  
205 (IDR) plots, used extensively to evaluate ChIP-seq peak callers[7, 3]. Briefly, RR plots answer the  
206 following simple question: given an algorithm  $A$  and a dataset  $D$ , if we rank all the events that  
207 algorithm  $A$  identifies as differentially spliced  $(1, \dots, N_A)$ , how many would be reproduced if you repeat  
208 this with dataset  $D'$ , comprised of similar experiments using biological or technical replicates? The  
209  $RR(n)$  plot, as shown in Fig. 2D, is the fraction of those events that are reproduced (y-axis) as a  
210 function of  $n \leq N_A$  (x-axis), with the overall reproducibility of differentially spliced events expressed as  
211  $RR(N_A)$  (far right point of each curve in Fig. 2D). In our RR analysis using groups of size 3 to 50  
212 GTEx samples each, we found both MAJIQ and MAJIQ HET compared favorably to the other  
213 methods, but with the new HET algorithm exhibiting improved detection power resulting in a higher  
214 number of AS events at the same reproducibility level.

215           The second statistic we used for evaluating performance on real data is the intra-to-inter ratio  
216 (IIR) [4], which serves as a proxy for FDR on real data where the labels are unknown. Specifically, IIR  
217 computes the ratio between the number of differentially spliced events reported when comparing  
218 groups of the same condition (e.g. brain) and the number of events reported for similar group sizes of  
219 different conditions (e.g. brain vs liver). In our work, we found IIR to be a lower bound estimate of  
220 true FDR, though it lacks theoretical guarantees. In the analysis shown in Fig. 2E, we found IIR to  
221 behave similarly to FDR on synthetic data with MAJIQ, MAJIQ HET, and LeafCutter exhibiting low  
222 IIR of 2%-6% even for small group sets of 5 samples, while rMATS, SUPPA2, and Whippet had an IIR  
223 of 13%, 26% and 46% respectively. However, unlike FDR on synthetic data, IIR dropped much more  
224 significantly, hitting practically zero for all methods for large sample groups. This result is to be  
225 expected since the IIR statistic compares sample groups of the same type, unlike the synthetic dataset  
226 described above where different tissues are compared.

227           The last component we included for assessing different methods' accuracy is a comparison to  
228 PSI quantifications using triplicates of RT-PCR assays, the gold standard in the RNA field. We  
229 previously produced over 100 such experiments from two different mouse tissues and showed MAJIQ  
230 compared favorably to SUPPA and rMATS[3, 4]. Here, we extended this analysis to LeafCutter and



231 found that MAJIQ's quantifications correlates significantly better with those of RT-PCR (see Fig. S2).  
232 We note that this analysis for LeafCutter was possible since all events we tested were simple cassette  
233 exon skipping, but it is not clear how to translate LeafCutter's output to actual PSI in the general case.

## 234 **VOILA v2 enables visualization of thousands of samples**

235 To facilitate visualization and downstream analysis of both the new outputs from MAJIQ HET over  
236 large, heterogeneous datasets and traditional MAJIQ PSI or MAJIQ dPSI quantification over replicate  
237 experiments, we developed VOILA v2 as a server based cross-platform app. Replacing the previous  
238 HTML file based visualization with VOILA v2 allows for interactive visualization of all LSVs in all  
239 genes, with data ranging from one sample to thousands of samples. After an initial indexing step that  
240 is run one time, users can now, on the fly, filter their data by several criteria including dPSI levels  
241 between groups, read coverage over junctions, LSV types and complexity, and the statistical test for  
242 significance, as opposed to re-running VOILA with the filtering criteria, as was required in the previous  
243 version. Another advantage of the new VOILA v2 is the ability to run it as a server so that results can  
244 be shared with collaborators without the need to transfer large files.

245 To highlight these new features, we ran MAJIQ HET and VOILA v2 on GTEx v8 brain tissues  
246 which are known to exhibit high levels of alternative splicing. Overall, this analysis involved 2,335  
247 RNA-seq samples from 374 donors across 13 tissue groups (see Methods). Figure 3A shows the  
248 VOILA view for this large dataset for the key splicing factor gene *PTBP1*, including a splicegraph  
249 (top) with combined read information from 225 cerebellum RNA-seq samples. Users can easily add  
250 and remove splicegraphs for other tissue groups or individual samples of interest. Figure 3A bottom  
251 panel shows a VOILA visualization for quantifying a single junction in a single LSV across the 2,335  
252 RNA-seq samples. Here, the 13 tissues are displayed as violin beeswarm plots with each point  
253 representing a single sample which can be interrogated by hovering the user's cursor over it. Finally,  
254 VOILA uses a heatmap (Fig. 3A bottom right) to represent the pairwise differences between the tissue  
255 groups for the junction of interest. The upper half of the heatmap represents the difference in medians  
256 of  $\mathbb{E}[\Psi]$  distributions between the tissue groups, while the bottom half represents the p-values  
257 associated with these group differences (see Methods). For the example LSV and junction in *PTBP1*,  
258 the cerebellar tissues (cerebellum and cerebellar hemisphere) show a distinct splicing pattern with  
259 reduced usage of this junction (lower  $\mathbb{E}[\Psi]$  values in the left-most violin plots) which was significant

260 according to MAJIQ HET (InfoScore shown) (Figure 3A).

261 **VOILA Modulizer defines alternative splicing modules to facilitate downstream**  
262 **analysis**

263 The LSV and junction showcased in the above example are of biological importance. PTBP1 is a  
264 widely expressed splicing factor that binds CU-rich sequences, but it is downregulated during  
265 neurogenesis which contributes to neuronal splicing patterns[8, 9, 10]. Decreased activity of PTBP1 in  
266 neuronal tissues is attributed to numerous mechanisms, some of which involve splicing regulation of  
267 two cassette exons in the region highlighted in the *PTBP1* splicegraph (Figure 3A,B boxed  
268 regions)[11, 3], making differences between brain subregions of potential interest. Mammalian-specific,  
269 neuronal skipping of an alternative cassette exon in the linker region between the second and third  
270 RNA recognition motifs (RRMs) of *PTBP1* (exon 12 in the splicegraph) results in a protein isoform of  
271 PTBP1 with reduced repressive activity leading to altered splicing patterns during neuronal  
272 differentiation[11]. Additionally, in mouse brain we previously described inclusion of a unannotated,  
273 premature termination codon (PTC) containing, cassette exon with conserved splice sites in humans  
274 that shows increased inclusion in mouse cerebellum (compared to brainstem and hypothalamus) and is  
275 developmentally regulated through murine cortex development[3]. While LeafCutter analysis of *PTBP1*  
276 on all of GTEx failed to detect this event in human tissues, we find evidence of *de novo* splice junction  
277 reads corresponding to both the conserved 3' and 5' splice sites of this unannotated exon that we  
278 validated previously in mouse (Figure 3B), suggesting this exon is also included in human brain tissues.

279 This region of the splicegraph is complex, however, and is defined by overlapping LSVs each  
280 with multiple splice junctions and intron retention detected (Figure 3B: exon 11 source LSV, left; exon  
281 13 target LSV, right). While the LSV formulation has several benefits, including accurate PSI  
282 quantification of complex splicing patterns involving more than two splice junctions[3], it is difficult for  
283 users to know which junction quantifications and combinations of junctions from different LSVs should  
284 be combined to define common alternative splicing (AS) events, like the cassette exons described  
285 above in *PTBP1*. Moreover, while certain annotated and *de novo* junctions may have sufficient read  
286 coverage for detection and quantification by MAJIQ, they can be very lowly included in a user's  
287 condition(s) of interest. For example, several hundred reads across GTEx brain samples support the

288 existence of the annotated, intron distal alternative 3'ss of exon 12 of *PTBP1*, but source LSV  
289 quantification of the relative usage of this junction is low across all samples (Figure 3B, left. Blue  
290 junction median PSI across samples of < 5% in all tissue groups). Such junctions add additional  
291 complexity to the splicegraph and may hinder definition of common AS event types across the  
292 transcriptome.

293 To overcome these limitations and to facilitate downstream, transcriptome wide analysis of  
294 common AS event types we developed the VOILA Modulizer (Figure 3C). First, users have the option  
295 to simplify the splicegraph to remove junctions that do not meet a threshold for raw read coverage,  
296 low inclusion levels across the input samples ( $\mathbb{E}[\Psi]$ ), and/or low relative splicing changes between  
297 input comparisons between sample groups ( $\mathbb{E}[\Delta\Psi]$ ) (Figure 3Ci). This helps remove junctions that do  
298 not meet a user's desired threshold for biological significance and facilitate downstream event  
299 definitions, like the alternative 3'ss of exon 12 of *PTBP1* discussed above with low inclusion levels  
300 across all sample groups (blue junction in Figure 3B, left). Next the simplified splicegraph is traversed  
301 to define single entry, single exit regions of the splicegraph that we call alternative splicing modules  
302 (AS modules or ASMs), as shown for part of *PTBP1* (Figure 3Cii). Within each AS module, pattern  
303 matching is performed between the remaining exon and junction structure of the simplified splicegraph  
304 to each of 14 basic AS event types (Figure S3A). This process is illustrated in Figure 3Ciii for two AS  
305 modules within *PTBP1*. We note that this step can lead to some redundant event information (e.g.  
306 intron retention events sharing the same junction and intron coordinates, as in Figure 3C). Because  
307 these events are quantified from both sides through a source and a target LSV, the quantification in  
308 terms of PSI or dPSI between conditions may not agree and thus both are provided. Nonetheless,  
309 downstream filtering can ensure agreement when counting event types and defining changing events.

310 Running the VOILA Modulizer produces a number of files based on event types with a uniform  
311 structure containing coordinate and quantification for each sample group to facilitate downstream  
312 analysis on AS modules and AS event types of interest (Figure S3A). Some AS event definitions  
313 identified by the Modulizer are analogous to those defined by other splicing quantification algorithms  
314 that only handle binary, classical splicing events (e.g. MISO[12] or rMATS[13]). However, the MAJIQ  
315 + VOILA Modulizer approach adds a number of benefits compared to other available algorithms.  
316 First, our approach allows for *de novo* splice junction and intron retention detection, which is crucial in  
317 the context of GTEx brain subregions. Using a simplification threshold of median  $\mathbb{E}[\Psi]$  over brain

318 tissue groups of  $\geq 5\%$  to be included in the simplified splicegraph, we defined 32,435 AS modules  
319 where 70.6% contain at least one unannotated splice junction and/or intron retention (Figure 3D,  
320 Figure S3B). The AS module formulation also allows for definition of common splicing patterns across  
321 brain subregions beyond binary splicing events, which made up 59.2% of all AS modules. The  
322 remaining 40% of AS modules contained multiple AS events which, in many cases, involved mixing of  
323 a classical event type with intron retention (Figure S3B). Both at the AS event level (Figure 3D) and  
324 at the AS module level (Figure S3B), intron retention was particularly common using our  
325 simplification threshold of median  $\mathbb{E}[\Psi]$  of greater than 5% in any one brain tissue group. This is  
326 consistent with previous studies that have found neuronal tissues to have very high levels of intron  
327 retention compared to other contexts[14].

328 Initial analysis of the most common AS module types led us to add additional splicing event  
329 patterns to our definitions, beyond those that are classically defined in other tools (intron retention,  
330 cassette exon, alternative 3' and 5'ss, alternative first and last exons, tandem cassette exons, and  
331 mutually exclusive exons[12, 13]). These included putative alternative first and last exons, where at  
332 least one alternative exon is created from a *de novo* junction that does not belong to any nearby exon,  
333 and putative alternative 3' or 5'ss, where a cassette exon has an inclusion junction removed during  
334 simplification (low inclusion) with sufficiently high intron retention levels (see Figure S3A for full  
335 details). These new splicing event types participated in the make up of 13.1% of AS modules or 11.6%  
336 of AS events overall detected in the brain (Figure 3D, event types marked with asterisks). Importantly,  
337 the Modulizer outputs all of these event types in a format amenable to downstream regulatory  
338 analysis, which will facilitate the future characterization of these splicing patterns (Figure S3A).

### 339 **Analysis of unique cerebellar splicing patterns highlights known and novel regulatory** 340 **programs**

341 Finally we wished to use MAJIQ + VOILA Modulizer to analyze differential splicing patterns between  
342 brain subregions. Previous studies focused on splicing quantitative trait loci within GTEx brain tissues  
343 found the cerebellar tissues cluster separately from other brain subregions based on splicing[15]. Our  
344 analysis of *PTBP1* (Figure 3B) and pairwise analysis of the number of significant LSVs according to  
345 MAJIQ HET further supports distinct splicing patterns in cerebellar tissues (Figure S4A). For these

346 reasons we sought to identify AS modules and events with unique splicing patterns in the cerebellum.  
347 Using the above AS module definitions from all junctions and introns with group level median  
348  $\mathbb{E}[\Psi] > 5\%$ , we next searched for consistent splicing changes between the two cerebellar tissues  
349 (cerebellum and cerebellar hemisphere) and other brain subregions using MAJIQ HET. We required an  
350 absolute difference in median  $\mathbb{E}[\Psi]$  values of 20% or more when comparing both cerebellar tissue  
351 groups to the same other brain region tissue group in addition to having a Wilcoxon rank-sum  
352  $p < 0.05$  (Figure 4A, see Methods).

353 From these comparisons we found 3,995 unique, changing AS modules (Figure 4B) comprising  
354 over 7,500 changing AS events (Figure S4B). At the changing AS module and AS event levels, intron  
355 retention was prevalent, followed by cassette exons and other mixtures of binary AS event types with  
356 intron retention (Figure 4B). As with the analysis based on inclusion levels alone (Figure 3), most  
357 changing AS modules (53.3%) consisted of multiple, binary AS event types (Figure 4B), highlighting  
358 the prevalence of complex splicing changes and the power of MAJIQ + VOILA Modulizer approach.

359 Alternative splicing regulation of cassette exons in neuronal tissues is very well studied with a  
360 number of expression changes associated with splicing factors (e.g. expression of the RBFOX family,  
361 down regulation of PTB proteins, expression of NOVA proteins, etc.) [9, 10]. For this reason we wished  
362 to analyze the regulatory signature around the cassette exons defined from our MAJIQ HET + VOILA  
363 Modulizer analysis to see if we could capture known, and potentially novel, regulatory motifs around  
364 cerebellar cassette exons.

365 Our initial analysis focused on all changing cassette exon (CE) events. This mirrors the CE  
366 landscape that would be identified by other splicing quantification algorithms and consists of a  
367 combination of CEs which come from modules consisting of only a single CE event in addition to those  
368 from complex modules with multiple event types (Figure 4B, arrowhead, Figure 4C, top). Because  
369 RNA binding proteins bind short motifs and splicing factor binding that results in alternative splicing  
370 regulation typically occurs proximal to the splice sites of an alternative exon [16], we performed a  
371 Z-score analysis for hexamer occurrence within 300 nucleotides upstream or downstream of cerebellar  
372 changing cassette exons versus those alternative exons that did not change between brain subregions  
373 (see Methods). Moreover, because splicing factors typically act in position-specific manners (e.g.  
374 binding downstream of a cassette exon enhances exon inclusion while binding downstream represses  
375 inclusion) [17, 18], we further separated cassette events into those with increased exon inclusion in

376 cerebellar tissues (Figure 4C, blue) and those with increased exon exclusion in cerebellar tissues  
377 (Figure 4C, red) when compared to other brain subregions.

378 Supporting the validity of our approach, this analysis uncovered a number of motifs either  
379 upstream or downstream of cerebellar cassette exons with known links to neuronal splicing regulation.  
380 For example, for cerebellar inclusion cassettes we found a number of CU-rich and UGC containing  
381 hexamers upstream and the RBFOX-binding-motif, UGCAUG[19], enriched downstream (Figure 4C,  
382 blue). SRRS6/nSR100 is known to bind UGC-containing sequences upstream of neuronal microexons  
383 to enhance their inclusion with the aid of SRSF11 that binds CU-repeat sequences[20]. Accordingly,  
384 motif maps across our different cerebellar exon classes based on hexamers shown to bind SRRS6[21]  
385 and SRSF11[20] by iCLIP show clear enrichment of these motifs just upstream of cerebellar inclusion  
386 cassette exons. This result is consistent with increased expression of these two genes in cerebellar  
387 tissues leading to enhanced intronic splicing enhancer (ISE) activity around these events (Figure  
388 S5A-E).

389 In addition to SRRS6 and SRSF11, the RBFOX family is highly expressed in neuronal tissues  
390 and is known to enhance exon inclusion when it binds downstream of the 5'ss[22, 23] (Figure S5G).  
391 Indeed, we find a strong enrichment of the known UGCAUG-binding site just downstream of cerebellar  
392 inclusion events (Figure 4C, blue). This result is consistent with increased expression of these genes  
393 and increased ISE activity in the cerebellum versus other brain subregions (Figure S5F-H).

394 Interestingly, we found hexamers containing motifs known to bind QKI (e.g. ACUAA  
395 containing[24]) were enriched around both cerebellar inclusion (upstream) and exclusion events  
396 (downstream) (Figure 4C). QKI is known to act as a splicing enhancer when it binds downstream of  
397 cassette exons and represses exonic inclusion when it binds upstream[24]. We generated a motif map  
398 of the QKI hexamer (ACUAAAY[25]) around these exon classes and found clear positional enrichment  
399 proximal to the regulated splice sites in both exon sets (Figure 4D, top). Moreover, we generated RNA  
400 maps of in vivo binding events (determined by CLIP peaks) of QKI across multiple cell types and  
401 found enriched binding consistent with the motif maps (Figure 4D, bottom, Figure S5I). Compared to  
402 other brain subregions, the two cerebellar tissues exhibited lowest expression of QKI (Figure 4E). This  
403 result points to a regulatory mechanism by which decreased expression of QKI in cerebellum may  
404 contribute to both cerebellar exon exclusion events (loss of enhancing activity downstream leading to  
405 exon skipping) and cerebellar exon inclusion events (loss of repressive activity upstream leading to

406 inclusion) (Figure 4F).

407         Given that many regulated cassette exons occur within AS modules containing other AS event  
408 types (Figure 4B), we next wished to explore if regulatory motifs differed between these subsets.  
409 Because AS modules containing cassette exons and those containing both cassette exon and intron  
410 retention events are common (Figure 4B, Figure S3B, S4B), we chose to stratify the set of all cassette  
411 exons into those that contained a regulated intron retention event and those that occurred in AS  
412 modules in which intron retention was not detected. We calculated Z-scores for hexamers from these  
413 exon subsets by comparing them against the set of exons that were not changing in cerebellar  
414 comparisons and compared the results of the two analyses. Figure 4G shows an example of this  
415 analysis for hexamers located downstream of cerebellar exclusion cassette exon subsets. The top two  
416 hexamers that match QKI binding motifs (ACUAAC and CUAACG) found when analyzing all CE  
417 events (Figure 4C) also had the highest Z-scores in the intron retention regulated and no intron  
418 retention CE subsets (Figure 4G, green). On the other hand, several of the G- and C-rich motifs that  
419 were enriched downstream of all CE cerebellar exclusion events (Figure 4C) were biased towards higher  
420 Z-scores solely in the CE subset that contained regulated intron retention (Figure 4G, orange). This is  
421 consistent with observations from previous studies analyzing intron retention events that found  
422 retained introns tended to be more G/C-rich when compared to non-retained introns[14]. Motif maps  
423 across the different cerebellar exclusion CE sets supported the Z-score analysis and highlight that the  
424 enrichment of G-rich sequences (Figure 4H, top) and C-rich sequences (Figure S6A,B) around all  
425 cerebellar exclusion CEs is driven mostly by the subset of CEs containing a regulated intron retention  
426 event (compare dashed orange and dashed fuchsia lines). The QKI hexamer showed similar positional  
427 enrichment downstream of both CE subsets (Figure 4H, bottom).

428         Similar results were seen when comparing Z-scores for upstream and downstream hexamers  
429 identified in the all cassette exon analysis (Figure 4C) of cerebellar inclusion and exclusion CE subsets  
430 stratified by intron status (Figure S6A). While some of the motifs found in the complete CE analysis  
431 scored similarly in subsets stratified by intron retention status (e.g. the RBFOX hexamer or SRRS6  
432 hexamers around cerebellar inclusion exons), others showed biased enrichment in CEs with regulated  
433 intron retention compared those with no intron retention (e.g. CU-repeat hexamers) (Figure S6).  
434 Overall, this analysis highlights some shared and distinct regulatory features of cerebellar cassette  
435 exons with and without evidence of intron retention.

## 436 Discussion

437 The work presented here represents the culmination of continuous development of MAJIQ since its  
438 original release in 2016[3]. The original MAJIQ, like many other algorithms, was designed for  
439 comparing relatively small groups of RNA-seq from biological replicates. However, as we demonstrate  
440 here using GTEx v8, datasets nowadays can easily grow to hundreds and thousands of non-replicate  
441 samples. The sheer size and heterogeneous nature of such data poses challenges that go beyond just  
442 algorithm efficiency. Additional challenges include the ability to capture but also simplify *de novo* and  
443 complex splicing variations, the ability to define subtypes over such complex splicing events, and the  
444 ability to visualize and process such events and subtypes for downstream analysis. MAJIQ v2 is the  
445 only algorithm, to the best of our knowledge, that supports such features through efficient  
446 implementation of several algorithmic innovations we introduced here: The simplifier, the modulizer,  
447 incremental build options, and the VOILA v2 visualization package. In addition, we perform extensive  
448 comparison of MAJIQ v2 to other algorithms, create a resource for reproducible algorithm comparison  
449 in the form of both data and software package, and demonstrate the utility of the new splicing analysis  
450 features by performing a detailed analysis of differential splicing between more than 2,300 samples  
451 from GTEx v8 brain subregions.

452 The algorithmic contributions in this work include a new method to quantify *de novo* intron  
453 retention, an incremental build, addition of the MAJIQ HET statistics which do not assume a shared  
454 PSI between samples in a group, and the modulizer in VOILA. The resulting new features enhance  
455 splicing analysis, especially on larger datasets. For example, MAJIQ's incremental build saves much of  
456 the processing needed when adding new samples to existing repositories. Labs or centers can thus  
457 process data such as GTEx once, then efficiently add more relevant samples as needed. Notably, our  
458 performance evaluations discussed below show performance for the first analysis, but subsequent  
459 analyses can be expected to be even faster. Furthermore, as these datasets get larger, we also expect  
460 to see more *de novo* junctions. These junctions increase the complexity of the splice graph and the size  
461 of splicing events considered. The MAJIQ simplifier enables users to more finely control how this  
462 complexity enters the analysis.

463 The new features of MAJIQ v2 are accompanied by matching ones in VOILA v2 visualization  
464 and analysis package. The VOILA Modulizer provides a new view of splicing changes on the



splicegraph in terms of splicing modules. These complex units can be broken down into classical  
splicing events that may share similar splicing regulation, but allow for a more refined classification  
than traditional approaches, as demonstrated in our analysis of brain subregions. In contrast, tools  
that only list classical events (e.g. rMATS) quantify those solely based on the reads within these event  
definitions. Consequently, reads outside these event definitions, which can greatly alter the splicing  
quantification, are ignored. In addition, the VOILA viewer now allows for interactive visual analysis  
and supports a server version, allowing large analyses performed on cluster or cloud environments to  
be viewed without downloading large datasets locally.

In terms of performance we showed MAJIQ v2 compares favorably to available methods. In  
terms of efficiency, we showed MAJIQ v2 is as fast and memory efficient as the two most efficient  
tools, rMATS-turbo and LeafCutter. This is a notable achievement given that MAJIQ is the only tool  
amongst those that offers detection and quantification of *de novo* intron retention. Accounting for IR  
in splicing analysis is computationally expensive but nonetheless important in many settings as we  
discuss below.

On synthetic data, MAJIQ and LeafCutter were the only two tools that simultaneously  
demonstrated both low FDR and FNR when identifying genes with differential splicing. We note that  
our usage of LeafCutter included additional filtering for  $\Delta\Psi > 20\%$  beyond the default p-value based  
filtering as we found that the default settings performed much worse[26]. Whippet was the only other  
tool that also exhibited low FNR, but it demonstrated FDRs over 20%. Our results suggest that many  
genes called as differentially spliced by Whippet, rMATS, and SUPPA are false discoveries.  
Furthermore, it suggests that rMATS and SUPPA miss a substantial fraction ( $> 40\%$ ) of the genes  
that it should call as differentially spliced.

On real RNA-seq data from GTEx we found MAJIQ outperformed the other tools. Specifically,  
MAJIQ's reproducibility, measured using the reproducibility ratio, was consistently higher than all  
other tools. The difference between MAJIQ and other tools was particularly striking when comparing a  
small number of samples but persisted even when comparing 50 vs 50 samples. Comparing MAJIQ  
HET introduced here to MAJIQ dPSI from[3], we found both to have similar reproducibility, but HET  
offered a significant increase in detection power. While LeafCutter was comparable to MAJIQ on the  
synthetic dataset, we found that its reproducibility on real data was not, exhibiting reproducibility  
lower than rMATS and comparable to SUPPA2. When using intra-to-inter ratio (IIR) to assess false

495 discovery, we found IIR approached 0 when considering larger numbers of samples for all tools.  
496 However, for very small sample numbers of 3 vs 3, only MAJIQ and LeafCutter achieved IIR below  
497 10%.

498 The extensive evaluations we performed here serve not just to assess the specific tools we  
499 included, but as a service for the community. First, we created the largest synthetic RNA-seq dataset  
500 to date, with over 300 samples. In contrast to many other works, the data generated here was based  
501 on real life GTEx samples. It also does not reflect MAJIQ's model and was based instead on  
502 transcript-based quantifications by other algorithms (RSEM). As such, we would expect it to benefit  
503 tools that are built around a similar model (e.g. SUPPA). A second contribution is the evaluation  
504 package we created, `validations-tools`. This package allows users to not only reproduce our results but  
505 also to easily add future tools and repeat the analysis for future developers or for anyone who wants to  
506 assess performance on their own unique dataset. We highly recommend researchers and cores to take  
507 advantage of this as it is possible that on a dataset with other characteristics the various algorithms  
508 would perform differently. Finally, we note that the efforts to create reproducible results in genomics  
509 and specifically for tool development are constantly ongoing. We previously documented in detail  
510 issues we identified with using using outdated software, software misuse, and lack of reproducibility for  
511 analysis scripts and data that severely affected software assessment, including MAJIQ[26]. We hope  
512 the reproducibility tools we included here will help avoid such issues and make it easier for future  
513 developers to achieve at least the "bronze" level of reproducibility as was recently proposed[27].

514 Finally, applying our improved pipelines to GTEx brain subregions allowed us to define the  
515 complex alternative splicing patterns observed across over 2,300 heterogeneous human neuronal tissue  
516 samples from 374 donors and 13 tissue groups. Our approach and subsequent analysis offers several  
517 advances compared to previous efforts. For example [15] also analyzed differential splicing in brain  
518 subregion splicing but included only annotated, classical splicing events identified by rMATS. Several  
519 other GTEx analyses use LeafCutter's framework and focus on detecting sQTLs. Our work advances  
520 these efforts through improved quantification accuracy (described above) and our LSV based  
521 approach, which is the only method able to capture *de novo* and complex splicing events as well as  
522 retained introns (IR). Furthermore, as we illustrated here for cerebellum specific regulation, our newly  
523 introduced definition of AS modules and AS event types greatly facilitate downstream regulatory  
524 analysis.

525 Applying MAJIQ HET and AS subtypes from the VOILA modulizer allowed us to discover  
526 additional, novel complexity within transcripts for the crucial splicing regulator, PTBP1, including a *de*  
527 *novo*, premature stop codon containing exon in human that we previously validated in mouse brain  
528 subregions[3]. This exon was preferentially included in cerebellar tissues, leading us to focus on the  
529 cerebellar specific splicing program. Our regulatory analysis on cerebellum specific cassette exons  
530 highlighted many known splicing regulators previously shown to be essential in neuronal splicing  
531 programs (i.e. the RBFOX family, SRRS6 with SRSF11, PTBP1, and QKI[9, 10, 20]), highlighting the  
532 validity of our approach and definitions of cassette exons based on complex LSVs. Crucially, the  
533 MAJIQ + VOILA Modulizer approach allowed us to stratify this superset of cassette exon events into  
534 different subsets based on the presence or absence of other AS event types within the module (e.g.  
535 CEs with or without intron retention). While some motifs are shared and similarly enriched around  
536 CEs with and without regulated intron retention (e.g. RBFOX and QKI), other motifs were specifically  
537 enriched in the intron containing subset only. In the case of cerebellar exon exclusion events, the signal  
538 for G/C rich motifs observed on the superset of all CEs was driven entirely by the subset of CEs  
539 containing intron retention events. We anticipate the new ability we introduced here to interrogate AS  
540 modules made up of combinations of AS event types will facilitate future regulatory discoveries in  
541 other datasets from additional biological contexts.

542 We note that there are key limitations to the regulatory analysis we performed for  
543 cerebellar-specific splicing, which was based solely on bulk tissue RNA-seq experiments from GTEx.  
544 Previous work leveraging single cell data to deconvolute bulk GTEx tissues into their relative cell type  
545 compositions suggests that cerebellar tissues contain relatively larger proportions of neurons compared  
546 to other brain subregions[28]. This fact can confound the interpretation of our results in terms of  
547 neurobiology as neurons are known to express certain splicing factors (e.g. RBFOX3/NeuN, SRRS6),  
548 which may explain the cerebellar splicing pattern we observed here. Thus, future directions for  
549 improving MAJIQ involve accounting for cell type heterogeneity as well as combining long reads for  
550 isoform specific deconvolution. Other promising directions for future exploration include analysis of  
551 RNA sequencing for clinical diagnostics and exploiting MAJIQ's advantages for improved sQTL  
552 analysis.

553 In summary, we introduced here a significant update to the original MAJIQ package. MAJIQ  
554 v2 empowers fast, detailed, and accurate analyses of large heterogeneous RNA-seq datasets and is

555 already supporting a highly active user group spanning hundreds of labs, centers and companies across  
556 the world. Our analysis of brain subregions provides a compelling example of such analysis on over  
557 2,300 human neuronal tissue samples leading to several novel findings related to cerebellum specific  
558 splicing regulation. We hope the analysis we performed, along with the tool, data, and evaluation  
559 package we supply will inspire many more researchers to delve into splicing regulatory analysis in their  
560 own data and make exciting new discoveries.

## 561 **Methods and Materials**

### 562 **MAJIQ builder**

563 In this subsection, we review how the MAJIQ builder prepares the structure and observations per  
564 experiment that are used for downstream splicing quantification as part of a scalable and principled  
565 approach to splicing analysis of large numbers of experiments. We describe the MAJIQ builder's new  
566 approach for estimating intron read rates, which allows junction and intron coverage to be calculated  
567 once and reused efficiently for multiple analyses, unlike other methods that quantify intron retention.  
568 We also describe the MAJIQ simplifier, which reduces the complexity of the structural models of  
569 splicing used in quantification that especially arises from the analysis of large and heterogeneous  
570 datasets.

571 MAJIQ encodes the set of all possible splicing changes for a gene in terms of a splicegraph. A  
572 splicegraph is a graph-theoretic representation of a gene's splicing decisions from one exon to another,  
573 with exons as vertices and junctions and retained introns as distinct edges connecting exons. The  
574 exons of each gene are non-overlapping genomic intervals. Each junction has a source and target exon  
575 with a position within each exon, indicating the positions that are spliced together when the junction  
576 is used. Retained introns are between adjacent exons and indicate that intron retention between the  
577 exons is possible.

578 MAJIQ first constructs each gene's splicegraph by parsing transcript annotations from a GFF3  
579 file. Exon boundaries and junctions from each transcript for a gene are combined in order to produce  
580 the minimal splicegraph that includes each transcript's annotated exons and junctions, splitting exons  
581 by retained introns to ensure that each junction starts and ends in different exons. MAJIQ then  
582 updates the splicegraph with *de novo* junctions and introns found from processing input RNA-seq

583 experiments' junction and intron coverage.

584 MAJIQ processes aligned input RNA-seq experiments to per-position junction and intron  
585 coverage in the following way. First, MAJIQ identifies reads with split alignments. The genomic  
586 coordinates of each split corresponds to a potential junction. Meanwhile, the coordinate of the split on  
587 the aligned read is the junction's "position" on the read. MAJIQ counts the number of reads for each  
588 junction from each possible position. Afterwards, MAJIQ identifies reads that contiguously intersect  
589 known or potential introns (i.e. reads that intersect the genomic coordinates between adjacent exons  
590 without splits within the intron boundaries). If the intron start is contained in the aligned read, the  
591 intron "position" is defined as for junctions (treating the exon/intron boundary as a junction with zero  
592 length). For aligned reads intersecting the intron but not the start, additional positions are defined by  
593 the genomic distances of the first positions of the aligned reads to the intron start. These additional  
594 positions per intron increase the number of ways aligned reads can intersect introns in comparison to  
595 junctions. To adjust for this and model intron read coverage similarly to junction read counts, MAJIQ  
596 aggregates together adjacent intron positions to the equivalent number of possible positions per  
597 junction, taking the mean number of reads per reduced positions.

598 MAJIQ uses the obtained junction and intron coverage to update the splicegraph in the  
599 following way. Each potential junction is mapped to matching genes by prioritizing (1) genes that  
600 already contain the junction (i.e. annotated junctions) over (2) genes where both junction coordinates  
601 are within 400bp of an exon, which are prioritized over (3) genes where the junction is contained  
602 within the gene boundaries. The input experiments are divided into user-defined build groups. MAJIQ  
603 adds a *de novo* junction to the splicegraph if there is sufficient evidence for its inclusion in one of the  
604 build groups. This happens when the total number of reads and total number of positions with at  
605 least one read exceeds the user-defined minimum number of reads and positions in at least a minimum  
606 number of experiments. MAJIQ adds new *de novo* exons or adjusts existing exon boundaries to  
607 accommodate the added *de novo* junctions as previously described. Potential introns are added to the  
608 splicegraph under similar criteria, and their boundaries are adjusted or split to accommodate the  
609 adjusted or *de novo* exon boundaries.

610 Since processed intron coverage is averaged over the entire original intronic region, we can  
611 carry over the same coverage as an estimate for all resulting splicegraph introns, which are contained  
612 in the original intron's boundaries. In contrast, MAJIQ's previous approach, which is also used by most

613 other tools that quantify intron retention, quantified intron coverage using local counts of unsplit  
614 reads sharing the position of known junctions. These local counts must be calculated using  
615 information from all processed experiments (for all *de novo* junctions), which requires samples to be  
616 reprocessed each time an analysis with different samples are performed. MAJIQ's new approach allows  
617 intron coverage to be processed once and used for multiple builds with potentially different intron  
618 boundaries. This enables MAJIQ's new incremental build feature, which saves intermediate files with  
619 junction and intron coverage that can be calculated once and reused instead of BAM files for multiple  
620 builds. This reduces storage and time processing experiments that are part of multiple analyses.

621 While MAJIQ uses raw totals of read rates and number of nonzero positions for adding  
622 junctions and introns to the splicegraph, the MAJIQ builder performs additional modeling of  
623 per-position read rates for use in quantification. First, we mask positions with zero coverage and with  
624 outlier coverage. Outlier coverage is assessed under the observation that per-position read rates  
625 generally follow a Poisson distribution. For each junction/position, we use all other positions with  
626 nonzero coverage for that junction to estimate the Poisson rate parameter. Then, MAJIQ calls any  
627 position with an extreme right-tailed p-value (default  $10^{-7}$ ) under this model an outlier and ignores its  
628 contribution to coverage for quantification. Second, we perform bootstrap sampling of the total read  
629 rate over unmasked positions in order to model measurement error of true read rates. Under the  
630 assumption that each unmasked position is identically distributed, MAJIQ performs nonparametric  
631 sampling with replacement to draw from a distribution with identical mean and variance as the  
632 observed positions (see supplementary note). Since we assume that our read rates are generally  
633 overdispersed relative to the Poisson distribution, MAJIQ replaces nonparametric sampling with  
634 Poisson sampling when the nonparametric estimate of variance is less than the mean (i.e.  
635 underdispersed).

636 MAJIQ performs quantification of splicing events modeled as LSVs, which are defined by a  
637 splicegraph. A source (target) LSV is defined for an exon as a choice over the incoming (outgoing)  
638 edges to (from) that exon from (to) a different exon. In general, only LSVs with at least two edges are  
639 considered. MAJIQ builder prepares output files with raw and bootstrapped coverage for each  
640 junction/intron in each LSV for quick use by downstream quantifiers.

641 We observed that builds from many build groups or with high coverage tend to have  
642 increasingly complex splicegraphs and LSVs with many junctions. Many of these junctions are often

643 lowly used in all the samples but were included in the splicegraph because they had enough raw reads  
644 and positions (noisy *de novo*) or are part of an unused annotated transcript. This motivated the  
645 MAJIQ simplifier, which allows junctions and introns to be masked from the final splicegraph used for  
646 quantification. After the splicegraph is constructed using all input build groups, MAJIQ calculates the  
647 ratio of the raw read rate for each junction/intron relative to the other junctions/introns in each LSV.  
648 If a junction has consistently low coverage in each of the build groups relative to the other choices in  
649 the two LSVs it can belong to, it is “simplified” and removed from the final splicegraph. This reduces  
650 the complexity of the final splicegraph and quantified LSVs, making output files smaller and  
651 downstream quantification more efficient.

652 In summary, the MAJIQ builder combines transcript annotations and input RNA-seq  
653 experiments in order to build a splicegraph encoding all possible splicing events consistent with both  
654 annotations and data and to prepare read coverage for quantification in terms of LSVs. The MAJIQ  
655 builder’s new approach for estimating intron read rates allows junction and intron coverage to be  
656 calculated once and reused as part of an incremental build for multiple analyses, unlike other methods  
657 that quantify intron retention. The MAJIQ builder also introduces an approach for simplifying the  
658 complexity that arises in splicing events when processing large numbers of experiments. Overall, this  
659 allows the MAJIQ builder to produce structural models of possible splicing events and read coverage  
660 for downstream quantification that scale to the setting of large numbers of RNA-seq experiments.

## 661 **MAJIQ quantifiers**

662 MAJIQ provides three methods for quantifying RNA-seq experiments. MAJIQ PSI, MAJIQ dPSI, and  
663 MAJIQ HET, which we introduce in this paper. MAJIQ PSI and dPSI, which were previously  
664 described in [3], quantify groups of experiments that are assumed to be replicates with a shared true  
665 value of PSI per group. MAJIQ PSI estimates a posterior distribution of PSI ( $\Psi$ ) for a single group,  
666 while MAJIQ dPSI compares these distributions for two groups in order to estimate a posterior  
667 distribution for dPSI ( $\Delta\Psi$ ). MAJIQ HET compares two groups of samples but drops the replicate  
668 experiments assumption, enabling analysis of more heterogeneous samples. Instead, experiments are  
669 quantified individually and groups are compared under the assumption that the true values of PSI are  
670 identically distributed between the two groups.

All three pipelines share the same underlying machinery for inferring posterior distributions for

$\Psi$ . Formally,  $\Psi$  for a junction in an LSV is defined as the fraction of expressed isoforms using the junction out of all expressed isoforms containing the LSV. This fraction is not directly observable. Instead, we observe the number of reads aligned  $r_j$  to each junction  $j$  in the LSV. We model each  $r_j$  as a realization of a binomial distribution over the isoforms with probability  $\Psi_j$ :

$$r_j \sim \text{Binomial} \left( \sum_{j \in \text{LSV}} r_j, \Psi_j \right). \quad (1)$$

We take a Bayesian approach to integrate prior knowledge of  $\Psi$ , allowing for improved estimation when there is low read coverage. This requires a prior distribution on  $\Psi$ . We previously observed that most values of  $\Psi$  are nearly zero or one, which can be modeled using a generalization of the Jeffrey's prior for an LSV with  $J$  junctions:

$$\Psi_j \sim \text{Beta} \left( \frac{1}{J}, 1 - \frac{1}{J} \right). \quad (2)$$

This prior is conjugate to the binomial likelihood, allowing for efficient closed-form estimation of the posterior distribution of  $\Psi_j$  given the observed number of reads:

$$\Psi_j | \{r'_j : j' \in \text{LSV}\} \sim \text{Beta} \left( \frac{1}{J} + r_j, 1 - \frac{1}{J} + \sum_{j' \neq j} r'_j \right). \quad (3)$$

671 Since MAJIQ build obtains bootstrap replicates of observed read rates, we perform this posterior  
672 inference on each set of bootstrap replicate read rates to obtain an ensemble of posterior distributions.

673 For MAJIQ PSI, we obtain this ensemble of posteriors for replicate experiments by adding the  
674 observed read rates from the experiments that pass more stringent reads and position thresholds than  
675 the builder. MAJIQ PSI treats the average of the posterior distributions as a final distribution over  $\Psi$ .  
676 It reports point estimates of  $\Psi$  as the mean of this distribution ( $\mathbb{E}[\Psi]$ ) and saves a discretized version  
677 of the distribution for visualization in VOILA.

MAJIQ dPSI takes this a step further by using the posterior distributions on  $\Psi_1$ ,  $\Psi_2$  for two groups in order to compute  $\Delta\Psi = \Psi_2 - \Psi_1$  between the two groups. We start by computing the distribution of  $\Delta\Psi$  under the assumption of independence of  $\Psi_1$  and  $\Psi_2$  by marginalizing the product



of their distributions:

$$\mathbb{P}_{\text{ind}}(\Delta\Psi) = \sum_{\Psi_2 - \Psi_1 = \Delta\Psi} \mathbb{P}(\Psi)_1 \mathbb{P}(\Psi)_2. \quad (4)$$

We know that  $\Psi_1$  and  $\Psi_2$  are not independent, so we integrate our knowledge that  $\Delta\Psi$  is usually close to zero as a prior on  $\Delta\Psi$ . Following our previous work, we formulate our prior  $\mathbb{P}_{\text{prior}}(\Delta\Psi)$  as a mixture of three components: (1) a spike around  $\Delta\Psi = 0$ , (2) a broader centered distribution around  $\Delta\Psi = 0$ , and (3) a uniform slab. We determine our final posterior distribution on  $\Delta\Psi$  by adjusting  $\mathbb{P}_{\text{ind}}(\Delta\Psi)$  by the prior and renormalizing:

$$\mathbb{P}(\Delta\Psi) \propto \mathbb{P}_{\text{ind}}(\Delta\Psi) \mathbb{P}_{\text{prior}}(\Delta\Psi). \quad (5)$$

678 MAJIQ dPSI computes point estimates of  $\Delta\Psi$  using the posterior mean of the distribution ( $\mathbb{E}[\Delta\Psi]$ )  
679 and identifies confidence of measured changes in inclusion as posterior probabilities  $\mathbb{P}(|\Delta\Psi| > C)$ .

680 MAJIQ HET takes a different approach for comparing inclusion between two groups of  
681 experiments. MAJIQ HET drops the assumption of replicate experiments to consider heterogeneity in  
682  $\Psi$  between experiments within a group. Instead, MAJIQ HET assumes that the values of  $\Psi$  per  
683 experiment in each of the groups come from the same distribution. We evaluate this assumption using  
684 null hypothesis significance testing. Null hypothesis significance testing is performed using one (or  
685 more) of four tests: (1) Welch's two-sample t-test, (2) Mann-Whitney U test, (3) Total Number of  
686 Mistakes (TNOM) test, and (4) InfoScore test. Welch's two-sample t test and Mann-Whitney U test  
687 are well-documented elsewhere[29, 30]. Our implementation of Mann-Whitney U test computes exact  
688 p-values when there are at most 64 experiments and computes asymptotic p-values using normal  
689 approximation with tie and continuity correction for larger samples. Meanwhile, the InfoScore and  
690 TNOM tests are adapted from ScoreGenes[31]. The TNOM test evaluates how well a single threshold  
691 on PSI can discriminate between the observed values in the two groups. The Total Number of  
692 Mistakes is the minimum number of misclassified observations under the best possible thresholds. The  
693 distribution on TNOM when the distributions are equal are calculated using the closed-form formula in  
694 [32] to obtain p-values. Similarly, the InfoScore test evaluates how well a single threshold discriminates  
695 between groups, but, instead of measuring misclassifications directly, it identifies the threshold with  
696 the highest mutual information between the threshold and the true group labels. MAJIQ HET uses the

697 dynamic programming algorithm in [32] to evaluate the distribution of InfoScore under the null  
698 hypothesis in order to obtain p-values. All four tests require observed values of  $\Psi$  per experiment,  
699 which is not directly observed. MAJIQ HET accounts for variable uncertainty per experiment in our  
700 estimations of  $\Psi$  by repeated sampling of  $\Psi$  from the posterior distributions of quantified samples.  
701 MAJIQ HET computes the p-value for each repeated sample of  $\Psi$  over quantified experiments and  
702 reports the 95th-percentile over the resulting p-values. These p-value quantiles are not calibrated, so  
703 MAJIQ HET also computes p-values with the posterior means of  $\Psi$ . MAJIQ HET also reports the  
704 median of the observed posterior means of  $\Psi$  for each group. These p-values and the difference  
705 between the median observed posterior means are used together downstream in VOILA for the  
706 identification of high-confidence differentially spliced LSVs.

## 707 VOILA

708 VOILA provides a suite of post-processing and visualization tools designed to allow researchers to  
709 make use of MAJIQ quantifications directly, or easily format and filter the output for passing to other  
710 post-processing tools.

711 The VOILA viewer acts as a complete visualization tool for interactive analysis of output from  
712 MAJIQ PSI, dPSI, or HET. It includes search and filter mode for all discovered LSVs, as well as an  
713 in-depth viewer for the full splicegraph of a gene and all of the LSVs found within it. When using the  
714 VOILA viewer with output from MAJIQ HET, VOILA will also automatically generate heatmaps for  
715 each LSV with the to quickly indicate the discovered  $\Delta\Psi$  and statistical results from each group  
716 comparison. The viewer frontend runs completely within a web browser interface, so it is able to  
717 function with similar results on any modern operating system without installation of special  
718 frameworks or system libraries. The viewer can also be configured to run as a standalone web server  
719 such that the interactive results can be easily shared with collaborators. Tutorials and parameters are  
720 made available to integrate VOILA with a wide range of common web server production software.

721 VOILA also has a number of modes for filtering and rearranging data into a number of human  
722 and machine-readable files. Determining confidently non-changing (background) and confidently  
723 changing events is one of the primary use cases. We define highly-confident non-changing events from  
724 MAJIQ HET as being (1) above a nominal p-value threshold, (2) within-group variance is sufficiently  
725 low as measured by IQR, and (3) between-group  $\Delta\Psi$  is sufficiently low as measured by difference in

726 medians. We accept that the between-group  $\Delta\Psi$  threshold may be redundant in combination with the  
727 other two thresholds. We define confident changing events from MAJIQ HET as being (1) below a  
728 p-value threshold and (2) between-group  $\Delta\Psi$  is sufficiently high as measured by difference in medians.

729 In addition to the basic text output modes, there is a separate comprehensive output mode  
730 dedicated to finding specific event types/patterns called the VOILA Modulizer. The VOILA Modulizer  
731 searches for a large number of relevant patterns, both common and complex.

732 Each set of events is delimited on the basis of AS “modules” found by MAJIQ in each analyzed  
733 gene. Modules refer to areas of the splicegraph between single entry (one junction path, diverges to  
734 two or more) and single exit (all junction paths converge back to one).

735 Inside each of the AS “modules” detected by the modulizer, smaller AS “events” (sub patterns  
736 matching specific known organizations of junctions or introns) are then categorized. Currently, the list  
737 of potential patterns we match to find an event is fixed to a specific set, which can be found in Figure  
738 S3. All events which do not match any known splicing pattern are dumped to an “other” category  
739 which may be of possible interest in rare cases.

740 Modulizer supports any number or combination of MAJIQ experiments as input, in the form of  
741 PSI, dPSI, and/or HET VOILA files. These are used for narrowing modules to form around junctions /  
742 introns we find relevant, as well as to verify which AS modules and AS events are changing or  
743 non-changing, based on coverage,  $\Psi$ , and differences in  $\Psi$  ( $\Delta\Psi$ ). All filters may be disabled or  
744 adjusted.

745 At a high level, Modulizer uses a sequential pipeline for filtering and assembling output. First,  
746 all junctions and introns are read, and any which do not pass the reads, PSI, and/or dPSI thresholds  
747 are immediately removed from consideration. Then, using the remaining introns, and junctions,  
748 Modulizer identifies AS modules by looking for genomic locations with single-entry / single-exit as  
749 previously described. Then, Modulizer filters and removes modules which do not pass criteria such as  
750 not being sufficiently changing, lack of LSVs, or being constitutive. After filtering, Modulizer performs  
751 pattern matching for each AS event type on each AS module to identify all component AS events.  
752 Finally, Modulizer scans the input VOILA files for relevant quantifications in order to produce output  
753 TSV files for each individual AS event type, a high-level summary of all events found in each  
754 discovered module, and a summary of quantifications per module suitable for generating a heatmap  
755 according to the user’s filtering criteria (e.g. the shortest discovered junction within the AS module to

756 represent the inclusive AS product, the most changing junction in the AS module from HET and/or  
757 dPSI inputs, etc.).

## 758 **Sample selection from GTEx**

759 We selected from GTEx in the following way. We required all samples to have a RIN score of greater  
760 than 6. For performance evaluation we chose to evaluate a comparison between cerebellum and  
761 skeletal muscle. We randomly selected 150 samples from both tissues, excluding the same donor from  
762 being selected in both tissues. For the brain subregions analysis, we selected all samples in GTEx v8  
763 associated with brain tissue (not including pituitary gland). We also performed another analysis with  
764 all tissues in GTEx v8 using 30 or less samples per tissue. Samples were downloaded as FASTQ or as  
765 BAM and converted to FASTQ depending on when they were released. Samples that were part of v7  
766 are available on SRA, so they were downloaded using SRA Tools (v2.9.6) as FASTQ files. New  
767 samples from the v8 release are only available as BAMs on the cloud, so they were downloaded and  
768 converted to FASTQ using samtools (v1.9).

## 769 **Simulated RNA-seq as ground truth**

770 We used the expression quantification data from the GTEx v8 release as the basis for our simulations.  
771 Briefly, we downloaded the transcript quantification table  
772 (`GTEx_Analysis_2017-06-05_v8_RSEMv1.3.0_transcript_tpm.gct.gz`) and the gene-level  
773 quantification table (`GTEx_Analysis_2017-06-05_v8_RNASeQCv1.1.9_gene_reads.gct.gz`) from  
774 the GTEx portal (<https://www.gtexportal.org/home/datasets>). To match how the GTEx  
775 consortium performed these analyses, we downloaded the GRCh38 build of the reference genome  
776 sequence and gene models from v26 of the GENCODE annotation.

777 We selected 300 samples from GTEx to serve as the basis for 300 simulated samples, each real  
778 sample providing the expression distribution underlying one simulated sample. To run BEERS, we first  
779 need to prepare four configuration files that are customized for the desired dataset: `geneinfo`, `geneseq`,  
780 `intronseq`, and `feature quants`. The `geneinfo`, `geneseq`, and `intronseq` files define the structure and  
781 sequence information for each simulated transcript. As a result, these three files are determined solely  
782 by the choice of reference genome build and annotation. The feature quant files are specific to each

783 individual sample and define a distribution of transcript-level expression. First, we used the genome  
784 sequence and gene models to create the geneinfo, geneseq, and intronseq files. Since the genome is  
785 fixed across all simulated samples. We used the same set of these files to simulate all GTEx-derived  
786 samples. Next, we extracted TPM values for each sample from the GTEx transcript quantification  
787 table and used these distributions of TPM values to generate separate BEERS feature quant config  
788 files for each simulated sample. Lastly, to determine the total number of reads to simulate for each  
789 sample, we used the gene-level quantification file to count the total number of gene-mapping reads in  
790 each GTEx sample.

791 To simulated strand-specific reads with uniform coverage across no errors, substitutions, or  
792 intron retention events, we ran the BEERS simulator using the following command-line options:  
793 `-strandspecific -outputfq -error 0 -subfreq 0 -indelfreq 0 -intronfreq 0 -palt 0`  
794 `-fraglength 100,250,500.`

795 We transformed ground-truth transcript abundances into ground-truth splicing quantifications  
796 for each splicing quantification tool, taking into account the tools' differing definitions of splicing  
797 events. First, we defined ground-truth abundances for each exon or junction by adding the abundances  
798 of all transcripts including the exon or junction. Then, for each tool, we adopted their splicing event  
799 definitions, mapping the exon/junction abundances to compute their splicing quantifications.

## 800 MAJIQ

801 MAJIQ reports splicing quantifications with respect to LSVs. Therefore, ground-truth values for PSI  
802 were calculated by dividing the ground-truth abundance of each junction by the sum of the  
803 ground-truth abundances for all junctions in each LSV.

## 804 rMATS

805 rMATS reports a different format file per event type. But since all of them are classical binary event  
806 types, all can be reduced to two paths events, inclusion and exclusion. Each file contains the exon that  
807 defines each of the ways, so we calculate the  $\Psi_{gt}$  as inclusion/(inclusion + exclusion) using the exon  
808 transcript combination to get the exons ground-truth abundances for all junctions in each LSV.

## 809 **LeafCutter**

810 LeafCutter reports splicing quantifications with respect to intron clusters composed of several  
811 junctions. Ground-truth values for LeafCutter's splicing ratios were calculated using ground-truth  
812 junction abundances, similar to MAJIQ.

## 813 **SUPPA2**

814 SUPPA2 reports classical events similarly to rMATS. So the approach we use here is similar to that  
815 tool. The main difference is that SUPPA2 reports the junctions coordinate in each one of the paths,  
816 so we use those junctions ground truth quantification to obtain the  $\Psi_{gt}$  as inclusion / (inclusion +  
817 exclusion).

## 818 **Whippet**

819 Whippet outputs a psi.gz that contains the psi quantification of an event. That PSI is their formulation  
820 of the quantification from inclusion and exclusion paths. Differently to SUPPA2 or rMATS, Whippet  
821 combines a set of junctions to define a path, emulating in that way a transcript (or a portion of it).  
822 So, in order to find  $\Psi_{gt}$  of those paths, we look for those transcripts that include all the junctions (and  
823 virtual junctions). We combine the expression of those transcripts to find the  $\Psi_{gt}$  of each path.

## 824 **RNA-seq sample preprocessing before splicing analysis**

825 We aligned RNA-seq reads from real and simulated GTEx samples to the human genome for splicing  
826 analysis with MAJIQ and other tools using the following procedure. Simulated GTEx samples were  
827 generated as pairs of FASTQ files. We performed quality and adapter trimming on each sample using  
828 TrimGalore (v0.4.5). Some tools require reads aligned to the genome. For these tools, we used STAR  
829 (v2.5.3a) to perform a two-step gapped alignment of the trimmed reads to the GRCh38 primary  
830 assembly with annotations from Ensembl release 94. Other tools required transcript quantifications  
831 relative to annotated transcripts. For these tools, we used Salmon (v0.14.0) using the trimmed  
832 samples to estimate transcript abundances.

## 833 **Performance evaluations**

834 We wrote a package of evaluation scripts, called validations-tools, in order to compare MAJIQ in  
835 terms of speed, memory footprint, accuracy, and reproducibility for each one of the following tools:  
836 rMATS, LeafCutter, SUPPA2, and Whippet. This package was written to allow future users to not  
837 only reproduce our results but to easily add future tools and repeat these kinds of analyses with  
838 different datasets.

839 We adjusted the tools parameters following recommendations by each tool's authors. Specific  
840 parameters are listed in Table S2. For these comparisons, we evaluated the methods' computational  
841 efficiency and ability to identify splicing differences.

842 First, we evaluated computational efficiency of the different methods. We evaluated  
843 computational efficiency in terms of runtime and peak memory usage. Not all tools provide an  
844 extensive log of their execution, so, in order to measure wall time and memory usage, we used the  
845 output of '`usr/bin/time -v`'. We ran each method for all pairs comparisons between 10 groups  
846 with increasing sample sizes on an Ubuntu Linux environment with 32 cores (Intel Xeon 2.7GHz and  
847 64GB RAM).

848 Second, we evaluated the different methods' performance in quantifying splicing differences on  
849 simulated and real datasets. On the simulated datasets, where we know ground-truth differences in  
850 splicing between transcripts, we calculated true and false positive rates for the identification of splicing  
851 differences by each method. However, on real datasets, where no ground-truth is available, it is not  
852 possible to calculate true or false positive rates. Instead, we evaluated two metrics, reproducibility  
853 ratio (RR) and intra-to-inter ratio (IIR), on real (and simulated for comparison) data. The first metric,  
854 RR, measures the internal consistency of differential splicing tools. This internal consistency is  
855 reflected in the assumption that each tool should identify roughly the same events when repeating a  
856 comparison between two groups using different samples. We quantify this by performing two such  
857 comparisons and computing the fraction of the top  $n$  differentially-spliced events in the first  
858 comparison that are also in the top  $n$  events of the second comparison. This produces a  
859 "reproducibility-ratio" curve,  $RR(n)$  for the method as a function of the number of top events. If the  
860 first comparison yields  $N$  "significant" events,  $RR(N)$  is called the reproducibility ratio. For the  
861 specific case of MAJIQ, we note that in order to comparisons of LSV-type events more comparable to

862 classic AS events such as used by rMATS, we filtered out overlapping LSVs (i.e. those that share  
863 junctions) in order to avoid double-counting classic AS events. For example, a classic exon-skipping  
864 event would have matching source and target LSVs that overlap. However, we note that this filtering  
865 only reduces  $N_A$  but does not affect the reproducibility curves (apart from extending to a different  
866 value of  $N_A$ ) (Fig. S7). Although reproducibility of a method on real data is a scientifically important  
867 goal, it is not a sufficient goal because highly biased methods can be highly reproducible. To address  
868 this limitation, the second metric, IIR, is based on the principle that comparisons between (inter-) two  
869 groups should have many more significant events than comparisons within (intra-) a group.  
870 Furthermore, significant events within the group are likely false positives. This is quantified by  
871 computing the ratio of the number of significant events from an intra-group comparison to the number  
872 of significant events from an inter-group comparison. We evaluated these metrics for each tool with  
873 varying sample sizes to identify which methods outperformed each other in different settings.

#### 874 **Event-level evaluations**

875 In these evaluations we check reproducibility and accuracy of reported differentially spliced events by  
876 the various tools shown in Figure 2. As we describe in the main text, each tool defines alternative  
877 splicing events differently so that direct comparison of the events or their number between tools is not  
878 possible. Thus, when using real data each method was assessed by its own set of reported events to  
879 compute reproducibility ratios (RR) and intra to inter ratio (IIR) as in Figure 2D,E.

880 In contrast, when using GTEx based simulated data we do have the “ground truth” (denoted  
881 “gt” below) for the abundance of each transcript. We thus use these values to summarize  $\Psi$  and  $\Delta\Psi$   
882 observed in each method reported AS events and assess accuracy using the following definitions:

- 883 • True Positive:  $\max \Delta\Psi_{\text{tool}} \geq 20\%$  and  $\text{pvalue}_{\text{tool}} \leq 0.05$  and  $\max \Delta\Psi_{\text{gt}} \geq 20\%$
- 884 • True Negative:  $\max \Delta\Psi_{\text{tool}} < 5\%$  and  $\text{pvalue}_{\text{tool}} > 0.05$  and  $\max \Delta\Psi_{\text{gt}} < 5\%$
- 885 • False Positive:  $\max \Delta\Psi_{\text{tool}} \geq 20\%$  and  $\text{pvalue}_{\text{tool}} \leq 0.05$  and  $\max \Delta\Psi_{\text{gt}} < 5\%$
- 886 • False Negative:  $\max \Delta\Psi_{\text{tool}} < 5\%$  and  $\text{pvalue}_{\text{tool}} > 0.05$  and  $\max \Delta\Psi_{\text{gt}} \geq 20\%$
- 887 • Ambiguous: all other cases (when either  $\Delta\Psi \in [5\%, 20\%)$  or when  $\Delta\Psi$  and pvalue reported by  
888 the tool conflict),



889 where max is taken over all the junctions that belong to the AS events.

890 The above definitions were used to assess accuracy at the event level for each method, as  
891 shown in Figure S1, and also served as the base for gene level evaluations described below.

## 892 **Gene-level evaluations**

893 To facilitate more direct comparison between the different methods shown in Figure 2 we aggregated  
894 each tool AS events and their respective annotation as TP, TN, FP, and FN as given above to assess  
895 gene level performance. Naturally, gene level labels of TP, TN, FP and FN are defined based on the  
896 events they contain. The gene level labels are easy to define as positive or negative when all AS events  
897 embedded in it are considered positive or negative respectively. The problem arises when a gene has  
898 some of its events as false positives and false negatives. In that case, we prioritize the labels according  
899 to the following order: FP, FN, TP, TN. This means for example that an occurrence of a false positive  
900 event in a gene (according to the method's specific event definition) would be counted as a false  
901 positive gene even if some other events were correctly labeled as true negative or even true positives.  
902 The rationale for this prioritization is that (a) positive events are expected to be rare and (b) we care  
903 the most about trying to validate or follow up on wrong hits (false positives) followed by missing true  
904 changes (false negatives).

## 905 **GTEx brain subregion analysis**

### 906 **MAJIQ HET and VOILA Modulizer on brain subregions**

907 MAJIQ HET was run on all 13 choose 2 (78) pairwise comparisons from GTEx v8 brain tissue groups  
908 and the results were visualized with VOILA. Significant LSVs were those considered to be those  
909 containing at least one junction or intron with an absolute difference in group median  $\mathbb{E}[\Psi]$  values of  
910 20% or more between the two tissue groups and all four HET statistics (Wilcoxon, InfoScore, TNOM,  
911 and t-test) with  $p < 0.05$ .

912 The VOILA Modulizer was run on the resulting outputs with the following options:

913 `--decomplexify-psi-threshold 0.05` to remove all junctions and introns from the splicegraph  
914 that had tissue group median  $E(\text{PSI})$  of less than 5% across samples for every group; `--show-all` to  
915 include all AS modules and AS events in the output, not just those meeting the changing criteria.

916 Default values were used for other options that flag changing AS modules and AS events in the  
917 output. For changing: a minimum absolute median difference in PSI between groups of 20% or more  
918 for the primary threshold and a p-value of less than 0.05 across all four MAJIQ HET statistics  
919 (Wilcoxon, InfoScore, TNOM, and t-test). For non-changing: a maximum absolute median difference  
920 in PSI of 5% or less between groups; a maximum interquartile range in PSI within a group of 10% or  
921 less; and a p-value of 0.05 or greater across the MAJIQ HET statistics).

## 922 **PSI based AS module and AS counts across the brain**

923 Counting of AS modules based on the initial PSI simplification across the 13 brain tissue groups was  
924 done by parsing the resultant VOILA Modulizer summary file. This file is organized by AS module and  
925 lists the number of each of the 14 AS event types, outlined in Figure S3A, contained in each. AS  
926 modules were classified and counted based on the presence or absence of each of the 14 AS event  
927 types. Certain AS event type definitions overlap. Specifically, every tandem cassette exon containing  
928 AS module will also contain a multi exon skipping AS event and every putative 5' or putative 3'ss AS  
929 module will also contain an intron retention event. In these cases, the additional, partially redundant  
930 AS event type was added to the AS module classification if and only if their count within the module  
931 was larger than the count of the AS event they overlap with. For example, for an AS module to be  
932 classified as containing both tandem cassette exon (TCE) and multi exon skipping events (MES), the  
933 number of MES events within the module must be greater than the number of TCE events.

## 934 **Cerebellar AS module and AS event definitions**

935 Given the large number of LSV-based splicing differences between the two GTEx cerebellar tissues  
936 (cerebellum and cerebellar hemisphere) and the other brain subregions according to MAJIQ HET  
937 comparisons (Figure S4A), we wished to define AS modules and AS events based on these  
938 comparisons. These two cerebellar tissues were derived from sampling in duplicate, with cerebellar  
939 hemisphere sampled during initial tissue collection (frozen) and cerebellum sampled after the brain was  
940 received at the brain bank (PAXgene)[33]. Therefore, we focused our analysis on AS modules and AS  
941 events that displayed changes between both cerebellar tissues and one of the other subregions. For  
942 example, a cassette exon AS event would have to be labeled as changing according to the VOILA  
943 Modulizer filters (minimum absolute median difference in PSI between groups of 20% or more for the

944 primary threshold and a p-value of less than 0.05) in both cerebellum versus cortex and cerebellar  
945 hemisphere versus cortex to be counted. We defined all such consistent, changing cerebellar AS events  
946 from the 14 AS event files output by the VOILA Modulizer and used these to count the number of  
947 modules containing each AS event type or combination of types.

#### 948 **Cerebellar cassette exon regulatory analysis**

949 To perform regulatory analysis around exons with differential cerebellar inclusion patterns we first  
950 defined a high confidence set of cassette exons (CEs) by applying additional filters to those described  
951 above. In addition to the primary filter of an absolute median difference in PSI of 20% or more  
952 between a cerebellar tissue and another brain subregion for one junction in the CE event, a secondary  
953 threshold of an absolute median difference in PSI of 10% or more was enforced for all four junction  
954 quantifications of the CE (i.e. the inclusion source LSV junction quantification, the inclusion target  
955 LSV junction quantification, and the shared exclusion junction quantified in both the source and target  
956 LSV). Next we enforced that the direction of change between the two exclusion junction  
957 quantifications and the two inclusion junction quantifications agreed in their direction of change in  
958 cerebellar versus other tissues. If both inclusion junction quantifications increased in cerebellar tissues  
959 and both exclusion junction quantification decreased, this was considered a cerebellar inclusion CE  
960 events. The opposite directions were considered cerebellar exclusion CE events. Non-changing CE  
961 events were defined as those flagged as non-changing by the VOILA Modulizer in every comparison of  
962 both cerebellar tissues versus the other 12 brain tissues. For CE subset analysis, CE with intron  
963 retention (IR) events were those where one or more of the CE junctions was also involved in a  
964 changing IR event in cerebellar versus other tissues. CE with no IR events were those CE events that  
965 came from modules without any IR events detected.

966 For sequence analysis we extracted GRCh38 sequences for intronic regions 300 nucleotides (nts)  
967 upstream and 300 nts downstream of every CE in each set. We calculated Z-scores by comparing the  
968 occurrence of each hexamer in the upstream intronic region in each cerebellar set of regulated CEs  
969 versus the non-changing set of CEs. This was repeated for the downstream intronic region as well.

970 Motif maps were generated to visualize position specific enrichment of particular hexamers of  
971 interest. Each hexamer, or set of hexamers, were searched for over sliding windows of 20 nts in the  
972 splice site proximal regions around the CE (i.e. intronic region 300 nt upstream of the 3'ss plus 50 nt

973 downstream and 50 nt upstream of the 5'ss plus the intronic region 300 nt downstream). The  
974 frequency of occurrence was determined in each CE set and plotted using a running mean of 5 nts for  
975 smoothing.

976 RNAmaps for CLIP based binding of QKI were plotted in a similar way over the same splice site  
977 proximal regions. BED narrowPeaks files were downloaded for ENCODE eCLIP data [34] from  
978 [encodeportal.org](http://encodeportal.org) for QKI in K562 cells (accession ENCSR366YOG) or QKI in HepG2 cells (accession  
979 ENCSR570WLM) and replicate files were concatenated. BED narrowPeaks for uvCLAP data for QKI-5  
980 in HEK293 cells [35] were downloaded from GEO (accession GSE85155) and lifted over from GRCh37  
981 to GRCh38. These peak coordinates were overlapped with CE splice site proximal regions and the  
982 frequency of occurrence was assessed over the various cerebellar CE event sets at each position  
983 proximal to CE splice sites.

## 984 References

- 985 [1] Mar Gonzàlez-Porta et al. "Transcriptome analysis of human tissues and cell lines reveals one  
986 dominant transcript per gene". In: *Genome biology* 14.7 (2013), pp. 1–11.
- 987 [2] Barry Slaff et al. "MOCCASIN: A method for correcting for known and unknown confounders in  
988 RNA splicing analysis". In: *Nature communications* 12.1 (2021), pp. 1–9.
- 989 [3] Jorge Vaquero-Garcia et al. "A new view of transcriptome complexity and regulation through  
990 the lens of local splicing variations". In: *elife* 5 (2016), e11752.
- 991 [4] Scott S Norton et al. "Outlier detection for improved differential splicing quantification from  
992 RNA-Seq experiments with replicates". In: *Bioinformatics* 34.9 (Dec. 2017), pp. 1488–1497.  
993 ISSN: 1367-4803. DOI: 10.1093/bioinformatics/btx790. eprint: <https://academic.oup.com/bioinformatics/article-pdf/34/9/1488/25417002/btx790.pdf>.  
994 URL: <https://doi.org/10.1093/bioinformatics/btx790>.
- 995
- 996 [5] Yin Hu et al. "DiffSplice: the genome-wide detection of differential splicing events with  
997 RNA-seq". In: *Nucleic Acids Research* 41.2 (Nov. 2012), e39–e39. ISSN: 0305-1048. DOI:  
998 10.1093/nar/gks1026. eprint:

- 999 <https://academic.oup.com/nar/article-pdf/41/2/e39/25342067/gks1026.pdf>. URL:  
1000 <https://doi.org/10.1093/nar/gks1026>.
- 1001 [6] Christopher J Green, Matthew R Gazzara, and Yoseph Barash. “MAJIQ-SPEL: web-tool to  
1002 interrogate classical and complex splicing variations from RNA-Seq data”. In: *Bioinformatics*  
1003 34.2 (Sept. 2017), pp. 300–302. ISSN: 1367-4803. DOI: 10.1093/bioinformatics/btx565.  
1004 eprint: [https://academic.oup.com/bioinformatics/article-](https://academic.oup.com/bioinformatics/article-pdf/34/2/300/33331720/btx565.pdf)  
1005 [pdf/34/2/300/33331720/btx565.pdf](https://academic.oup.com/bioinformatics/article-pdf/34/2/300/33331720/btx565.pdf). URL:  
1006 <https://doi.org/10.1093/bioinformatics/btx565>.
- 1007 [7] Qunhua Li et al. “Measuring reproducibility of high-throughput experiments”. In: *The Annals of*  
1008 *Applied Statistics* 5.3 (2011), pp. 1752–1779. DOI: 10.1214/11-AOAS466. URL:  
1009 <https://doi.org/10.1214/11-AOAS466>.
- 1010 [8] Niroshika Keppetipola et al. “Neuronal regulation of pre-mRNA splicing by polypyrimidine tract  
1011 binding proteins, PTBP1 and PTBP2”. In: *Critical reviews in biochemistry and molecular*  
1012 *biology* 47.4 (2012), pp. 360–378.
- 1013 [9] Bushra Raj and Benjamin J Blencowe. “Alternative splicing in the mammalian nervous system:  
1014 recent insights into mechanisms and functional roles”. In: *Neuron* 87.1 (2015), pp. 14–27.
- 1015 [10] Celine K Vuong, Douglas L Black, and Sika Zheng. “The neurogenetics of alternative splicing”.  
1016 In: *Nature Reviews Neuroscience* 17.5 (2016), pp. 265–281.
- 1017 [11] Serge Gueroussov et al. “An alternative splicing event amplifies evolutionary differences between  
1018 vertebrates”. In: *Science* 349.6250 (2015), pp. 868–873.
- 1019 [12] Yarden Katz et al. “Analysis and design of RNA sequencing experiments for identifying isoform  
1020 regulation”. In: *Nature methods* 7.12 (2010), pp. 1009–1015.
- 1021 [13] Shihao Shen et al. “rMATS: robust and flexible detection of differential alternative splicing from  
1022 replicate RNA-Seq data”. In: *Proceedings of the National Academy of Sciences* 111.51 (2014),  
1023 E5593–E5601.
- 1024 [14] Ulrich Braunschweig et al. “Widespread intron retention in mammals functionally tunes  
1025 transcriptomes”. In: *Genome research* 24.11 (2014), pp. 1774–1786.

- 1026 [15] Yida Zhang et al. “Regional variation of splicing QTLs in human brain”. In: *The American*  
1027 *Journal of Human Genetics* 107.2 (2020), pp. 196–210.
- 1028 [16] Yoseph Barash et al. “Deciphering the splicing code”. In: *Nature* 465.7294 (2010), pp. 53–59.
- 1029 [17] Xiang-Dong Fu and Manuel Ares. “Context-dependent control of alternative splicing by  
1030 RNA-binding proteins”. In: *Nature Reviews Genetics* 15.10 (2014), pp. 689–701.
- 1031 [18] A Gregory Matera and Zefeng Wang. “A day in the life of the spliceosome”. In: *Nature reviews*  
1032 *Molecular cell biology* 15.2 (2014), pp. 108–121.
- 1033 [19] Jason G Underwood et al. “Homologues of the *Caenorhabditis elegans* Fox-1 protein are  
1034 neuronal splicing regulators in mammals”. In: *Molecular and cellular biology* 25.22 (2005),  
1035 pp. 10005–10016.
- 1036 [20] Thomas Gonatopoulos-Pournatzis et al. “Genome-wide CRISPR-Cas9 interrogation of splicing  
1037 networks reveals a mechanism for recognition of autism-misregulated neuronal microexons”. In:  
1038 *Molecular cell* 72.3 (2018), pp. 510–524.
- 1039 [21] Bushra Raj et al. “A global regulatory mechanism for activating an exon network required for  
1040 neurogenesis”. In: *Molecular cell* 56.1 (2014), pp. 90–103.
- 1041 [22] Gene W Yeo et al. “An RNA code for the FOX2 splicing regulator revealed by mapping  
1042 RNA-protein interactions in stem cells”. In: *Nature structural & molecular biology* 16.2 (2009),  
1043 pp. 130–137.
- 1044 [23] Martin Jacko et al. “Rbfox splicing factors promote neuronal maturation and axon initial  
1045 segment assembly”. In: *Neuron* 97.4 (2018), pp. 853–868.
- 1046 [24] Megan P Hall et al. “Quaking and PTB control overlapping splicing regulatory networks during  
1047 muscle cell differentiation”. In: *Rna* 19.5 (2013), pp. 627–638.
- 1048 [25] Andre Galarneau and Stephane Richard. “Target RNA motif and target mRNAs of the Quaking  
1049 STAR protein”. In: *Nature structural & molecular biology* 12.8 (2005), pp. 691–698.
- 1050 [26] Jorge Vaquero-Garcia, Scott Norton, and Yoseph Barash. “LeafCutter vs. MAJIQ and comparing  
1051 software in the fast moving field of genomics”. In: *bioRxiv* (2018). DOI: 10.1101/463927.  
1052 eprint: <https://www.biorxiv.org/content/early/2018/11/08/463927.full.pdf>. URL:  
1053 <https://www.biorxiv.org/content/early/2018/11/08/463927>.

- 1054 [27] Benjamin J Heil et al. “Reproducibility standards for machine learning in the life sciences”. In:  
1055 *Nature Methods* 18.10 (2021), pp. 1132–1135.
- 1056 [28] Margaret KR Donovan et al. “Cellular deconvolution of GTEx tissues powers discovery of disease  
1057 and cell-type associated regulatory variants”. In: *Nature communications* 11.1 (2020), pp. 1–14.
- 1058 [29] Bernard L Welch. “The generalization of ‘STUDENT’S’ problem when several different  
1059 population variances are involved”. In: *Biometrika* 34.1-2 (1947), pp. 28–35.
- 1060 [30] H. B. Mann and D. R. Whitney. “On a Test of Whether one of Two Random Variables is  
1061 Stochastically Larger than the Other”. In: *The Annals of Mathematical Statistics* 18.1 (1947),  
1062 pp. 50–60. DOI: 10.1214/aoms/1177730491. URL:  
1063 <https://doi.org/10.1214/aoms/1177730491>.
- 1064 [31] Yoseph Barash et al. “Comparative analysis of algorithms for signal quantitation from  
1065 oligonucleotide microarrays”. In: *Bioinformatics* 20.6 (Jan. 2004), pp. 839–846. ISSN:  
1066 1367-4803. DOI: 10.1093/bioinformatics/btg487. eprint: <https://academic.oup.com/bioinformatics/article-pdf/20/6/839/634843/btg487.pdf>.  
1067 URL: <https://doi.org/10.1093/bioinformatics/btg487>.
- 1068
- 1069 [32] Amir Ben-Dor, Nir Friedman, and Zohar Yakhini. “Overabundance analysis and class discovery  
1070 in gene expression data”. In: *Agilent Laboratories, Palo Alto, Tech. Rep* (2002).
- 1071 [33] GTEx Consortium et al. “The GTEx Consortium atlas of genetic regulatory effects across human  
1072 tissues”. In: *Science* 369.6509 (2020), pp. 1318–1330.
- 1073 [34] Eric L Van Nostrand et al. “A large-scale binding and functional map of human RNA-binding  
1074 proteins”. In: *Nature* 583.7818 (2020), pp. 711–719.
- 1075 [35] Daniel Maticzka et al. “uvCLAP is a fast and non-radioactive method to identify in vivo targets  
1076 of RNA-binding proteins”. In: *Nature communications* 9.1 (2018), pp. 1–13.
- 1077 [36] Ray Zhang et al. “A circadian gene expression atlas in mammals: implications for biology and  
1078 medicine”. In: *Proceedings of the National Academy of Sciences* 111.45 (2014),  
1079 pp. 16219–16224.
- 1080 [37] Florian C Oberstrass et al. “Structure of PTB bound to RNA: specific binding and implications  
1081 for splicing regulation”. In: *Science* 309.5743 (2005), pp. 2054–2057.

## 1082 **Acknowledgments**

1083 We would like to thank Dr. Elizabeth J. Bhoj for her input on the final manuscript and co-advising  
1084 JKA during the project.

### 1085 **Funding:**

1086 National Institutes of Health grants R01 AG046544, R01 LM013437, R01 GM128096 (YB).

1087 National Institutes of Health grant F30HD098803 (JKA).

1088 Blavatnik Family Fellowship in Biomedical Research (MRG).

### 1089 **Author contributions**

1090 YB conceived the project. JVG, JKA, SSN, and YB developed and tested the methodology for  
1091 MAJIQ HET. JKA conceived and implemented the final methodology for quantification, sampling, and  
1092 statistical testing in MAJIQ HET. JVG did the initial work porting Python code from MAJIQ v1 to  
1093 MAJIQ v2. JVG and YB developed the new IR quantification algorithm. JKA formalized the approach  
1094 for bootstrapping readrates. JVG and JKA implemented the updated MAJIQ Builder and MAJIQ PSI.  
1095 JVG implemented MAJIQ dPSI. CJG and PJ implemented the VOILA viewer with input from MRG,  
1096 CMR, and AJ. PJ, CMR, AJ, and YB developed the methodology for VOILA Modulizer. PJ  
1097 implemented the VOILA Modulizer. NFL and GRG generated the simulated RNA-seq data for the  
1098 performance comparisons. JVG carried out the performance comparisons vs other tools. MRG and CR  
1099 performed the modules analysis. MRG conceived and carried out the brain subregions analysis. YB,  
1100 JKA, and MRG wrote the final manuscript with input from PJ and JVG. All authors read and  
1101 approved the final manuscript.

### 1102 **Competing interests**

1103 The MAJIQ software used in this study is available for licensing for free for academics, for a fee  
1104 for commercial usage. Some of the licensing revenue goes to Y.B and members of the Barash lab.

### 1105 **Data and materials availability:**

1106 The code for MAJIQ and VOILA are available for academic/non-commercial use at  
1107 <https://majiq.biociphers.org/>. Licensing information for commercial use can be found at  
1108 <https://majiq.biociphers.org/commercial.php>. The code for validations-tools will be made  
1109 available at <https://bitbucket.org/biociphers/validations-tools>. All processed data and  
1110 code to reproduce figures will be deposited in a Zenodo before publication.



1111 GTEEx data used for the analyses in this manuscript are available in dbGaP under accession  
1112 phs000424.



1113 **Figures**

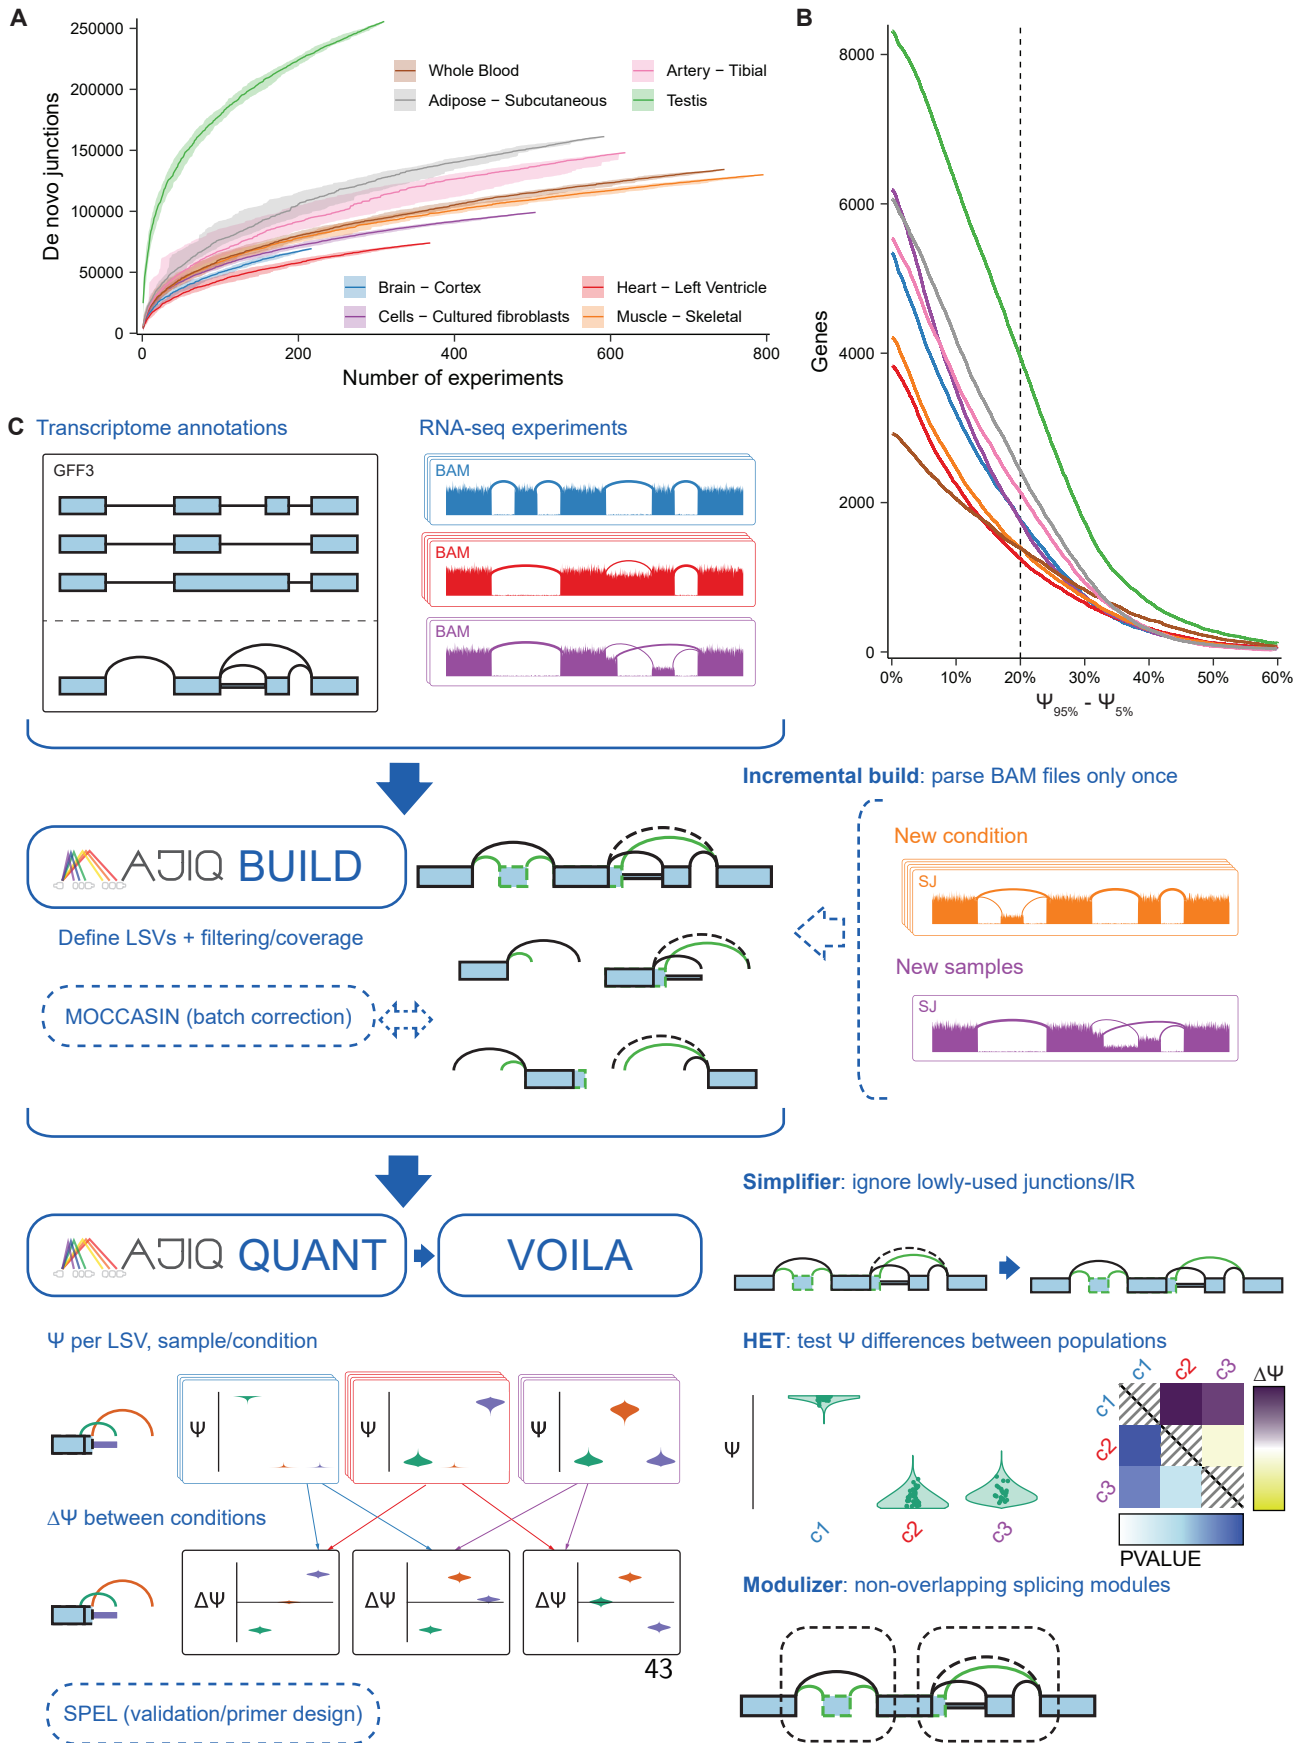

1114 **Fig. 1: MAJIQ efficiently and accurately models, quantifies, and visualizes RNA splicing from**  
1115 **large and complex RNA-seq datasets. (A)** The number of identified distinct unannotated *de novo*  
1116 junctions increases with larger subsets of different tissues from GTEx. Lines show the median over 30  
1117 randomly selected permutations over experiments in each subset, confidence bands show the 5th to  
1118 95th percentiles over permutations of samples per tissue. **(B)** The number of genes with at least one  
1119 junction where the difference between the 95th percentile and 5th percentile of PSI exceeds a given  
1120 value for different tissues from GTEx (same tissues/colors as in Fig. 1A). Dashed vertical line indicates  
1121 how many genes have a difference in PSI exceeding 20%. **(C)** MAJIQ combines annotated transcript  
1122 databases and coverage from input RNA-seq experiments to build a model of each gene as a collection  
1123 of exons connected by annotated and *de novo* junctions and retained introns (splicegraph). Junctions  
1124 and retained introns sharing the same source or target exon form local splicing variations (LSVs).  
1125 MAJIQ quantifies the relative inclusion of junctions and retained introns in each LSV in terms of  
1126 percent spliced in (PSI,  $\Psi$ ) and provides VOILA to make interactive visualizations of splicing  
1127 quantifications with respect to each gene's splicegraph and LSV structures. MAJIQ v2 introduces an  
1128 incremental build, which allows RNA-seq coverage to be read from BAM files only once to a coverage  
1129 file (SJ), accelerating subsequent builds with different experiments. MAJIQ v2 introduces a simplifier,  
1130 which can be used to reduce splicegraph/LSV complexity by ignoring lowly used junctions and retained  
1131 introns. MAJIQ v2 introduces a new mode for quantification, HET, which compares PSI differences  
1132 between populations of independent RNA-seq experiments and accounts for variable uncertainty per  
1133 experiment. MAJIQ v2 introduces the modulizer, which allows performing analysis relative to  
1134 non-overlapping splicing modules rather than LSVs.

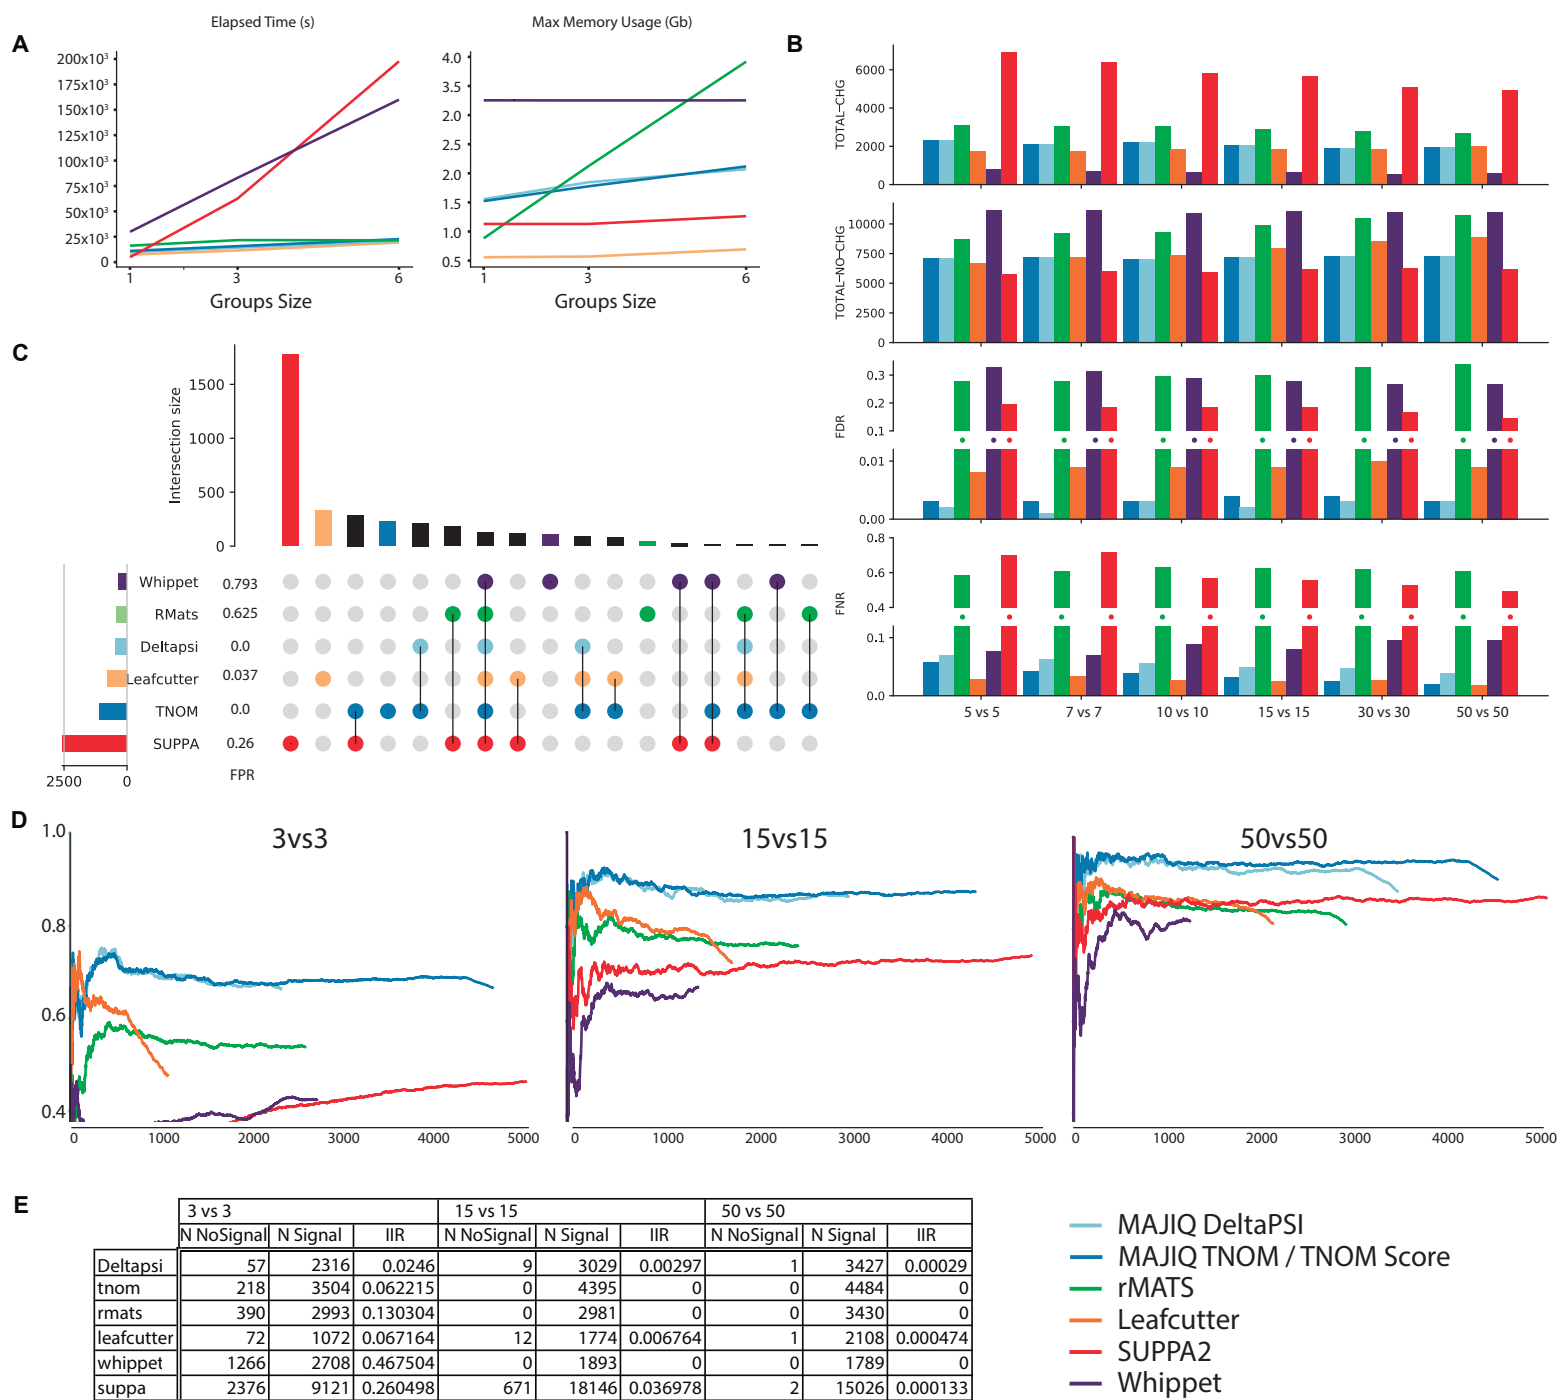

1135 **Fig. 2: Performance evaluation using synthetic and real data. (A)** Time (left) and memory  
1136 (right) consumption when analyzing multiple sample groups. Results shown are for running all pairwise  
1137 differential splicing analysis between 10 tissue groups from GTEx v8 as the number of samples per  
1138 group increases from 1 to 6 (x-axis). **(B)** Performance evaluation for differential splicing calls using  
1139 simulated GTEx cerebellum and skeletal muscle samples and aggregated over genes (see main text and  
1140 Methods). Metrics include the total number of genes reported as changing or non changing by each  
1141 method, and the associated FDR and FNR. X-axis denotes the size of the groups. **(C)** Upset plot  
1142 based on the 10vs10 analysis shown in (B). The bars on top represent the overlap between genes  
1143 reported as differentially spliced by each method indicated below it. The bars and FPR values by each  
1144 method name on the left refer to genes reported only by that method. **(D)** Reproducibility ratio (RR)  
1145 plots for real data, using GTEx cerebellum and liver samples. Analysis here is based on each method's  
1146 reported list of splicing events (not genes) and unique scoring approach. X-axis is the ranked number  
1147 of events reported by each method and Y-axis is the fraction of those events reproduced within the  
1148 same number of top-ranking events when repeating the analysis using a different set of samples from  
1149 the same tissue groups. The length of the line represents the total number of differentially splicing  
1150 events reported by each method (see Methods for details). RR graphs are shown for comparing group  
1151 sizes of 3 (left), 15 (middle), and 50 (right). **(E)** Intra-to-Inter Ratio (IIR) results for GTEx samples as  
1152 in (D). IIR computes the ratio between the number of events reported as significantly changing when  
1153 comparing two sample groups of the same type (N No Signal column) and the number of events  
1154 reported as significantly changing when comparing groups of different types (here GTEx liver and  
1155 cerebellum samples as in (D)).

## A Voila view for interactive analysis

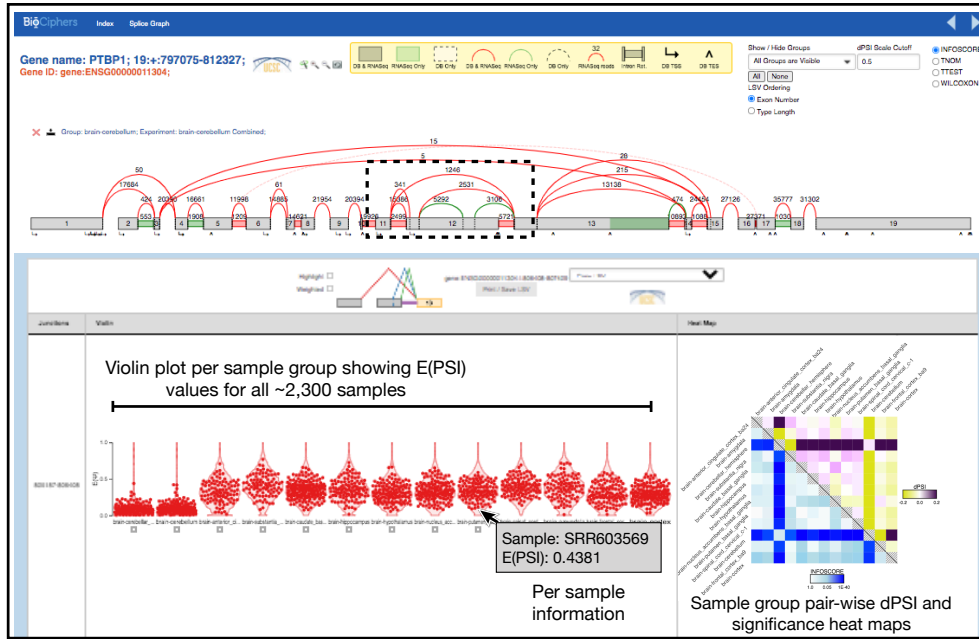

## B

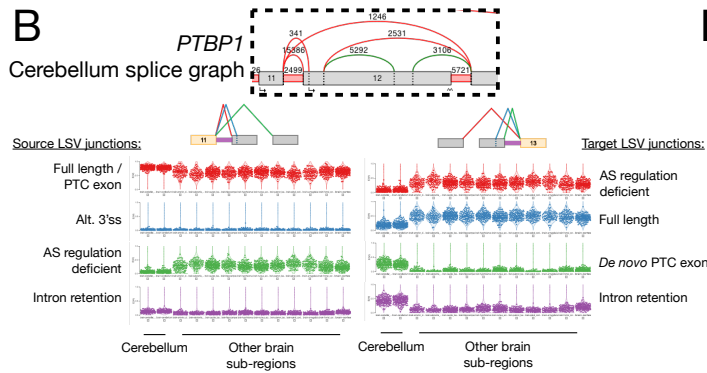

## D

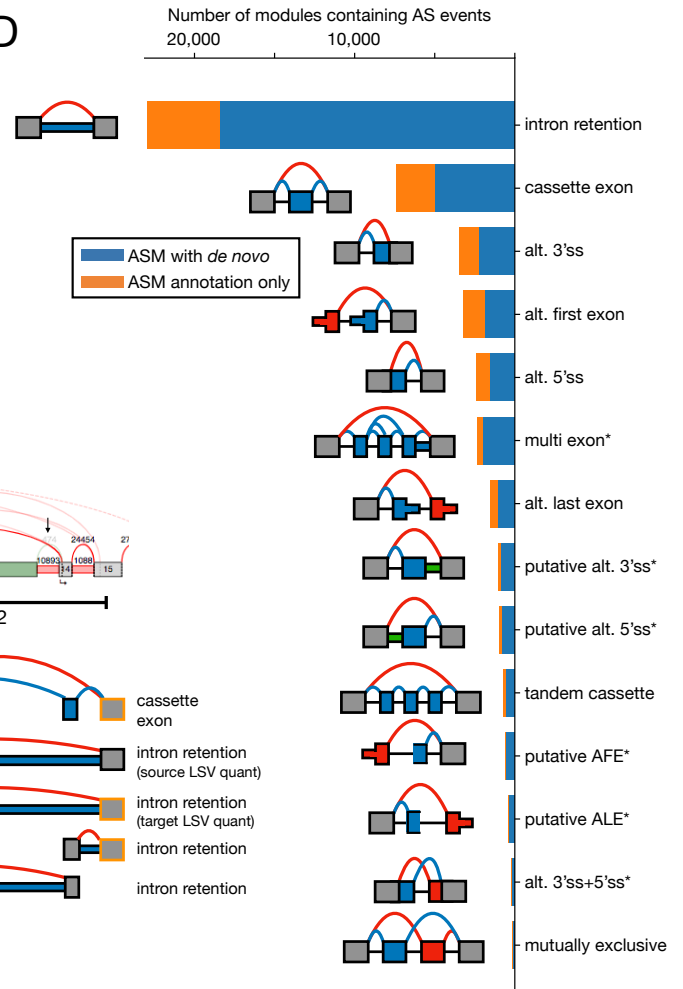

## C Voila Modulizer

i) Remove junctions with low read support, E(PSI), and/or dPSI from splice graph

ii) Traverse splice graph and define single entry / exit AS modules

iii) Define AS events within each module

iv) Categorize modules based on AS event components

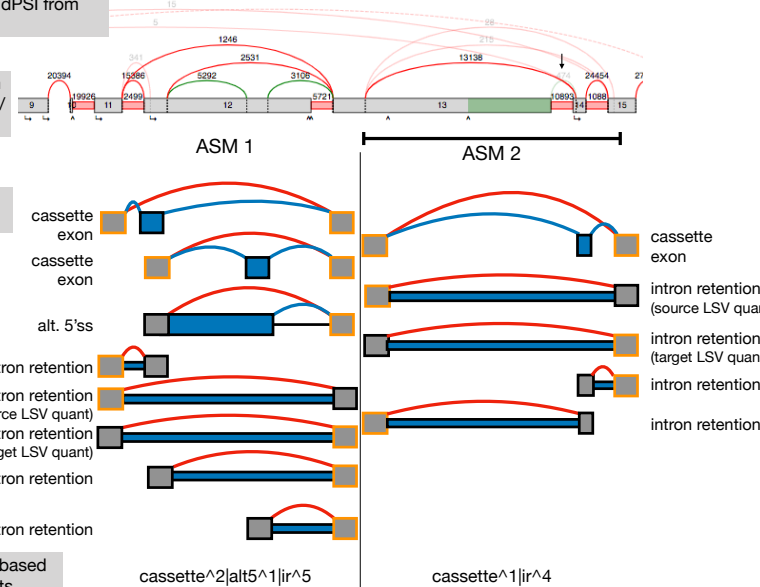

1156 **Fig. 3: Enhanced visualization of large datasets and downstream analysis of alternative**  
1157 **splicing modules with VOILA v2. (A)** VOILA view of MAJIQ HET output for 13 brain tissue  
1158 groups from GTEx from 2,335 RNA-seq samples originating from 374 unique donors. Top portion  
1159 shows gene information and filtering criteria as well as the splicegraph for *PTBP1* showing combined  
1160 reads from 225 cerebellum samples. Bottom portion displays visualization and PSI quantification for  
1161 each junction in each LSV for the gene of interest. Here the distribution of  $\mathbb{E}[\Psi]$  values across the  
1162 indicated tissue groups is displayed as a violin beeswarm plot for the red junction for the exon f13  
1163 target LSV, represented in the cartoon, for all 2,335 RNA-seq samples. Individual sample information  
1164 is given by hovering the cursor over individual points that represent each sample (gray box). Bottom  
1165 right heatmap displays MAJIQ HET quantifications of all group pairwise comparisons across the 13  
1166 brain tissue groups to highlight significant splicing changes. Yellow to purple color scale on the top  
1167 right indicates the expected  $\Delta\Psi$  between tissue groups while blue color scale on the bottom left  
1168 indicates the significance of the difference between group PSI distributions for one of four statistics  
1169 used by MAJIQ HET (InfoScore displayed). **(B)** Top shows region of human *PTBP1* splicegraph (with  
1170 reads from combined cerebellum samples) and two LSVs corresponding to a mammalian specific exon  
1171 skipping event that alters *PTBP1* splicing regulatory activity [11] (green junction in exon 11 source  
1172 LSV, left; red junction in exon 13 target LSV, right) and *de novo* detection of a conserved,  
1173 PTC-containing exon previously shown to be included in mouse neuronal tissues [3] (green junction in  
1174 exon 13 target LSV). Bottom shows distribution of PSI across the 13 brain tissue groups as well as  
1175 annotation of each junction. **(C)** VOILA Modulizer workflow (gray boxes) and an example region of  
1176 the *PTBP1* splicegraph where junctions that did not meet a median  $\mathbb{E}[\Psi]$  value of 5% or more in any  
1177 of the 13 brain tissue groups were removed (arrows). Two alternative splicing modules (ASMs) were  
1178 defined as single entry, single exit regions of the splicegraph and within these modules binary, AS  
1179 events are defined. Gray exons highlighted in yellow indicate reference exons that belonged to LSVs for  
1180 which MAJIQ quantification exists. Blue junctions and exonic or intronic regions indicate inclusion of  
1181 the alternative region of the event and red junctions indicate exclusion of the alternative region. **(D)**  
1182 Stacked bar chart showing the number of binary AS event types that make up AS modules across the  
1183 13 brain tissue groups from GTEx. AS event types are represented with a cartoon to the right of the  
1184 chart and are named to the left of bars. Asterisks indicate non-classical AS event types. Each junction  
1185 or intron had to have a median of  $\mathbb{E}[\Psi]$  values of 5% or more across the samples of at least one tissue



1186 group to contribute to AS module definitions. Blue regions indicate AS events that contained *de novo*  
1187 junctions and/or introns not found in the Ensembl transcriptome annotation (VERSION?) while  
1188 orange regions indicate AS events containing only annotated junctions and introns.

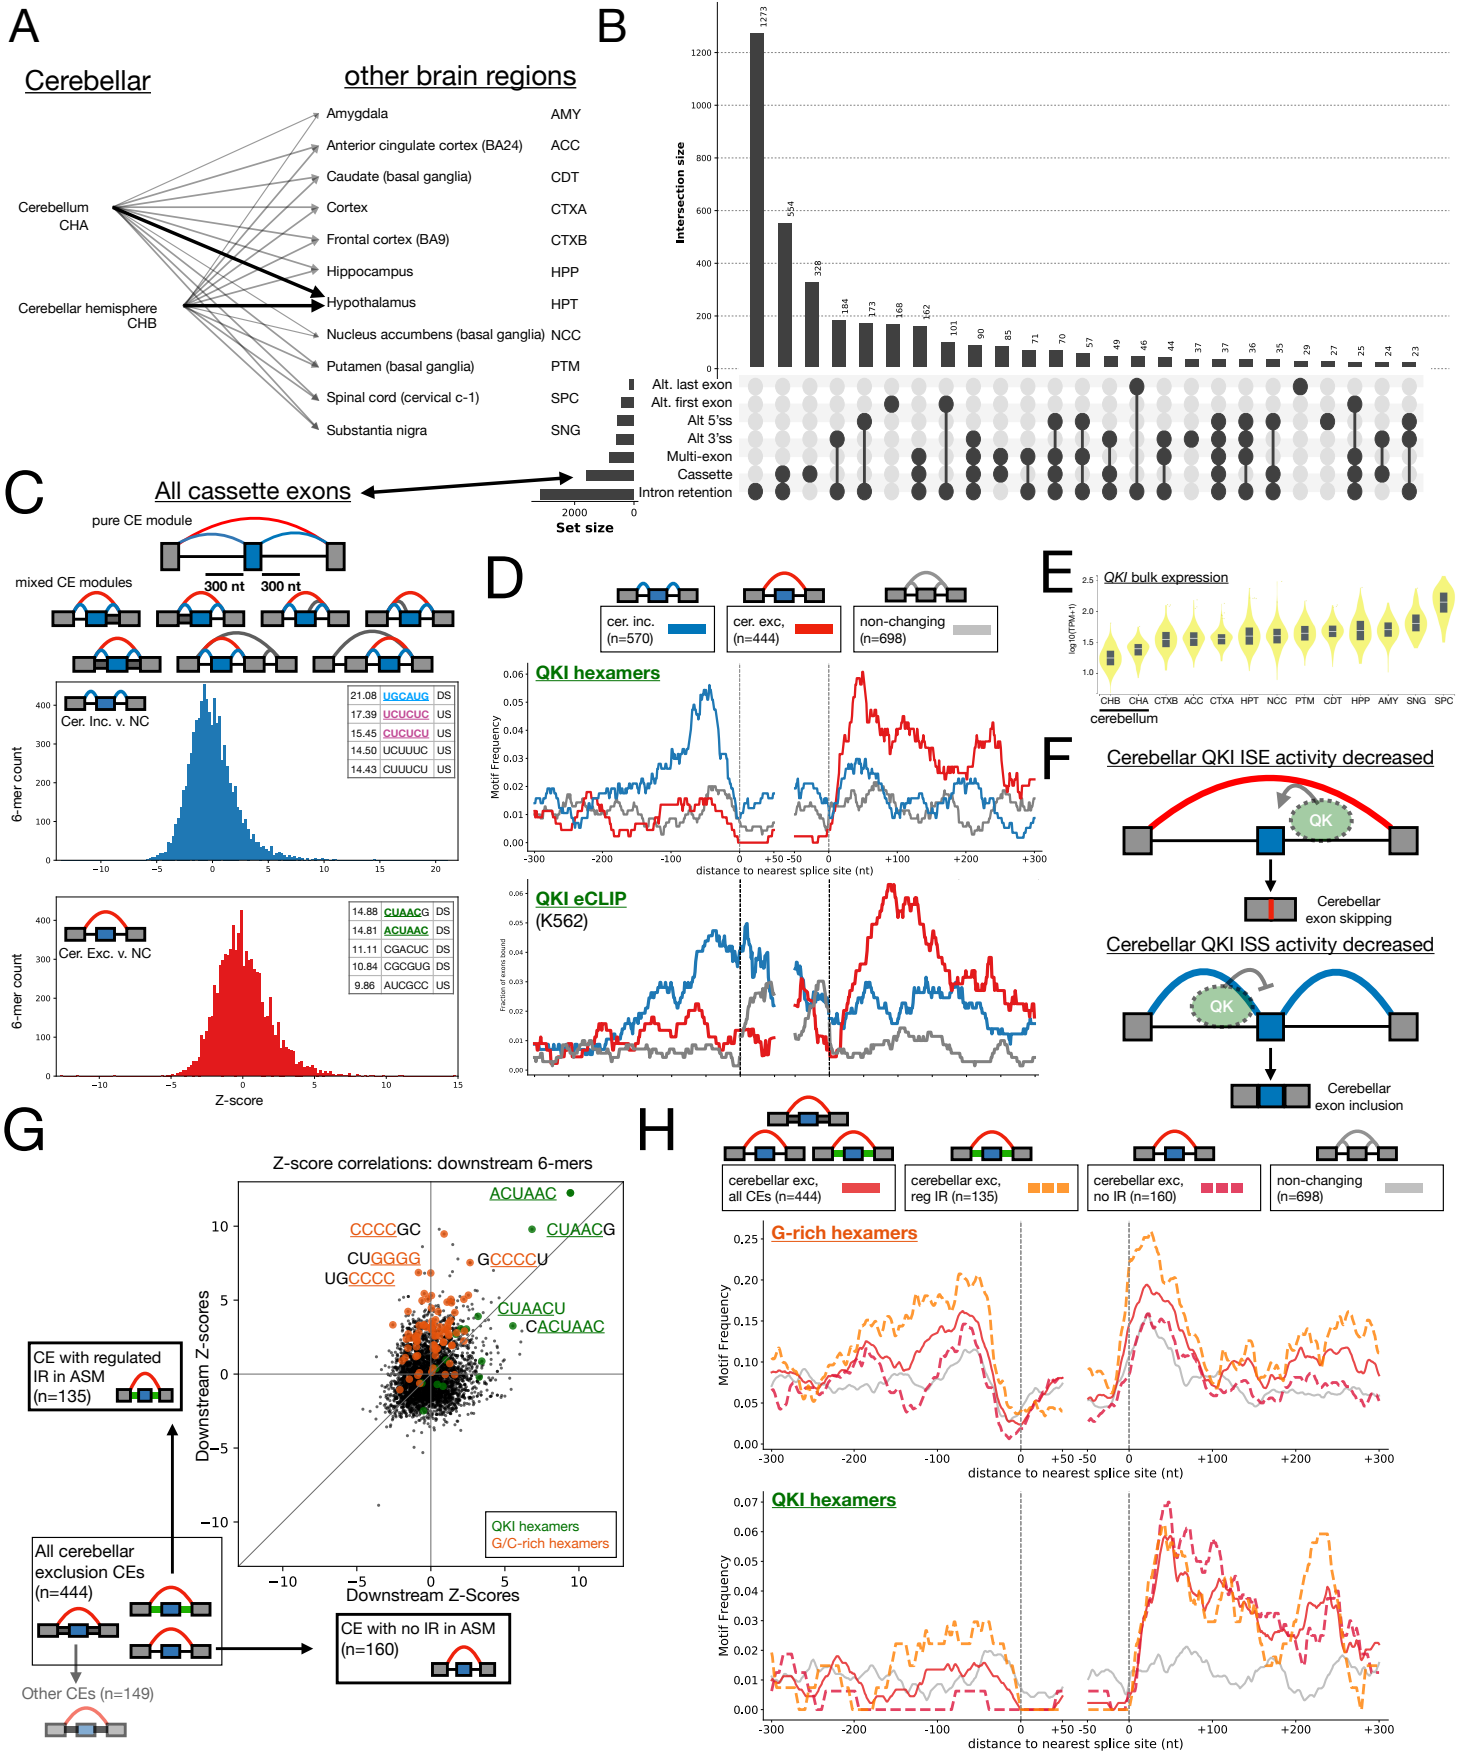

1189 **Fig. 4: MAJIQ HET + VOILA Modulizer defines the complex landscape of cerebellar splicing**  
1190 **changes and regulation. (A)** Pairwise comparisons run through MAJIQ HET to find significant  
1191 splicing changes between GTEx cerebellar tissues (cerebellum and cerebellar hemisphere) versus the  
1192 other 11 brain tissue groups. Dark arrows indicate an example of a consistent change, where both  
1193 cerebellar tissue groups versus the same other brain region, the hypothalamus, shared a significant  
1194 change. Alternative splicing modules (AS modules) were kept for downstream analysis if at least one  
1195 such consistent comparison was significant (see Methods). GTEx abbreviations are given to the left of  
1196 each tissue. **(B)** Upset plot showing the consistent, significantly changing AS event type(s) that make  
1197 up AS modules. AS events had to have an absolute difference in median  $\mathbb{E}[\Psi]$  of 20% or more when  
1198 comparing both cerebellar tissue groups (cerebellum and cerebellar hemisphere) to the same other  
1199 brain region tissue group in addition to having a Wilcoxon rank-sum  $p < 0.05$  as reported by MAJIQ  
1200 HET. **(C)** Top shows examples of all cassette exons (CEs) used for motif analysis. All CEs have  
1201 quantified inclusion junctions (blue junctions) and a shared exclusion junction (red junction),  
1202 potentially within a mixture of other AS event types (gray junctions and introns). Bottom shows  
1203 distribution of Z-scores for hexamer motif occurrences within 300 nucleotides upstream or within 300  
1204 nucleotides downstream of all CE events when comparing CEs showing significant cerebellar inclusion  
1205 versus CEs that did not change when compared to other brain regions (see Methods) (middle, blue) or  
1206 when comparing CEs showing cerebellar exclusion versus non-changing CEs (bottom, red). Top motifs  
1207 corresponding to putative binding sites of RBPs of interest are highlighted (QKI (green), RBFOX  
1208 (light blue), SRRS6 (yellow), SRSF11 or PTB (purple)). All motifs and Z-scores are given in Table S1.  
1209 **(D)** RNAmaps showing the frequency of QKI hexamer motif occurrence (top, ACUAAY frequency over  
1210 sliding windows of 20 nucleotides with smoothing using a running mean of 5 nucleotides) or in vivo  
1211 binding of QKI (K562 eCLIP peaks frequency, bottom) around cerebellar inclusion (blue), exclusion  
1212 (red), or non-changing (gray) CEs. **(E)** *QKI* bulk tissue gene expression ( $\log_{10}(1 + \text{TPM})$ ) for  
1213 ENSG00000112531.16) sorted by median brain tissue expression. Chart generated using  
1214 [gtexportal.org](http://gtexportal.org). **(F)** Model for QKI position dependent regulation in GTEx brain tissues. Decreased  
1215 expression of QKI in cerebellar tissues results in a decrease in downstream intronic splicing enhancer  
1216 (ISE) activity of QKI, leading to cerebellar exon exclusion (top, red), and a decrease of upstream  
1217 intronic splicing silencer (ISS) activity of QKI, leading to cerebellar exon inclusion (bottom, blue),  
1218 when compared to other brain tissue groups. **(G)** Scatter plot showing hexamer Z-score

1219 correspondence for two non-overlapping sets of cerebellar CE exclusion events: (y-axis) CE exclusion  
1220 events which came from AS modules containing changing intron retention (IR) event(s) versus  
1221 non-changing and (x-axis) CE exclusion events from AS modules without IR event(s) detected. Motifs  
1222 of interest are highlighted according to colors in the inset. **(H)** RNAmaps of motifs of interest for  
1223 given sets of cerebellar exclusion cassette exon event sets. Top shows G-rich hexamer motif occurrence  
1224 (five of six positions are G and contains GGGG) while bottom shows QKI hexamers (ACUAAAY).  
1225 Frequencies were determined over sliding windows of 20 nucleotides with smoothing using a running  
1226 mean of five. Lines indicate CE exon set according to the legend: red, all cerebellar exclusion CEs;  
1227 orange dashed, subset of exclusion CEs which also contained a changing IR event; fuchsia dashed,  
1228 subset of exclusion CEs with no IR event with the AS module; gray, all CEs which were not changing  
1229 between comparisons.

## 1230 **Supplementary Materials**

### 1231 **Supplementary Note: procedure for bootstrapped readrates from per-position reads**

1232 MAJIQ's bootstrapping procedure can be defined as follows. Without loss of generality, consider a  
1233 single junction. For each RNA-seq read aligned with a split for this junction, we define the read's  
1234 position relative to the junction (or vice-versa) with a position  $i$  and count the number of reads  
1235 associated with each position, which we call  $S_i$ .

1236 These raw readrates include biases that we would like to correct for; in particular, we define an  
1237 explicit procedure for removing stacks by comparing the number of reads at each position against a  
1238 Poisson model using the observed readrates at all other positions, which results in a set of  
1239 stack-corrected nonzero readrates  $R_i$  for  $i \in \{1, \dots, P\}$ , where  $P$  is the number of nonzero positions  
1240 after stack removal. These are the observed units for bootstrapping, so to emphasize:

$$R_i \equiv \# \text{ of RNA-seq reads associated with } i\text{-th position,} \quad (\text{observed readrates})$$
$$i \in \{1, \dots, P\}. \quad (\text{nonzero positions after stack removal})$$

1241 Other methods typically sum directly over positions  $R_i$  (really  $S_i$  since they generally also  
1242 ignore read stacks) to produce a total junction readrate for use in quantification:

$$R \equiv \sum_{i=1}^P R_i. \quad (\text{observed total junction readrate})$$

1243 Since we are unsatisfied with uncertainty/variance accounted for by directly using  $R$ , we  
1244 generate samples from a bootstrap distribution over the  $P$  nonzero positions.

1245 If we make the assumption that we are given the number of nonzero positions  $P$  and that the  
1246 underlying readrate for each of these positions is independent and identically distributed with finite  
1247 mean  $\mathbb{E}[R_i] = \mu$  and variance  $\mathbb{V}[R_i] = \sigma^2$ , we can derive the mean and variance of our observed total  
1248 readrate:

$$\begin{aligned}
 \mathbb{E}[R] &= \mathbb{E}\left[\sum_{i=1}^P R_i\right] \\
 &= \sum_{i=1}^P \mathbb{E}[R_i] \\
 &= P\mu, && \text{(observed total readrate mean)} \\
 \mathbb{V}[R] &= P\sigma^2. && \text{(observed total readrate variance)}
 \end{aligned}$$

1249 If we were able to take two samples for the observed total readrate (i.e.  $R$  and  $R'$ ), their  
 1250 difference has mean 0 and variance  $2P\sigma^2$ .

1251 We define our bootstrapping procedure over observed nonzero reads  $R_1, \dots, R_P$  to generate  
 1252 bootstrapped total reads  $\hat{R}, \hat{R}', \dots$  such that the variance of the difference between bootstrap samples  
 1253 would be equivalent to that of the difference between two samples from the true distribution (i.e.  
 1254  $2P\sigma^2$ ). In order to do this, we take  $P - 1$  samples from  $\{R_1, \dots, R_P\}$  with replacement and scale their  
 1255 sum by  $P/(P - 1)$ .

It is straightforward to see that the bootstrapped total readrate has the same mean as the observed total readrate. In order to prove that the variance of the difference between two sample matches, we note that the covariance  $\text{Cov}(R_{Z_k}, R_{Z_{k'}})$  between any two draws from the observed per-position readrates with  $Z_i \sim \text{Uniform}(P)$  is:

$$\begin{aligned}
 \text{Cov}(R_{Z_k}, R_{Z_{k'}}) &= \mathbb{E}[(R_{Z_k} - \mu)(R_{Z_{k'}} - \mu)] \\
 &= \mathbb{E}[R_{Z_k} R_{Z_{k'}}] - \mu^2.
 \end{aligned}$$

. We note that  $\mathbb{E}[R_i R_j] = \sigma^2 \delta_{ij} + \mu^2$  (where  $\delta_{ij}$  is the Kroencker delta). When  $k = k'$ , it follows that  $\mathbb{E}[R_{Z_k} R_{Z_{k'}}] = \sigma^2 + \mu^2$ . Otherwise, the law of total expectation gives:

$$\begin{aligned}
 \mathbb{E}[R_{Z_k} R_{Z_{k'}}] &= \mathbb{E}[\mathbb{E}[R_{Z_k} R_{Z_{k'}} | Z_k, Z_{k'}]] && \text{(given } k \neq k') \\
 &= \frac{1}{P^2} \sum_{i=1}^P \sum_{j=1}^P \sigma^2 \delta_{ij} + \mu^2 \\
 &= \mu^2 + \frac{1}{P} \sigma^2.
 \end{aligned}$$

Combining the two cases, we have:

$$\begin{aligned}\mathbb{E} [R_{Z_k} R_{Z_{k'}}] &= \delta_{kk'} (\mu^2 + \sigma^2) + (1 - \delta_{kk'}) \left( \mu^2 + \frac{1}{P} \sigma^2 \right) \\ &= \mu^2 + \frac{1}{P} \sigma^2 + \delta_{kk'} \frac{P-1}{P} \sigma^2.\end{aligned}\quad \text{(second moment of sampled readrates)}$$

Therefore,

$$\text{Cov} (R_{Z_k}, R_{Z_{k'}}) = \frac{1}{P} \sigma^2 + \delta_{kk'} \frac{P-1}{P} \sigma^2.\quad \text{(covariance of sampled readrates)}$$

Thus, the variance of the bootstrapped total readrate is

$$\begin{aligned}\mathbb{V} [\hat{R}] &= \frac{P^2}{(P-1)^2} \mathbb{V} \left[ \sum_{k=1}^{P-1} R_{Z_k} \right] \\ &= \frac{P^2}{(P-1)^2} \sum_{k=1}^{P-1} \sum_{k'=1}^{P-1} \text{Cov} (R_{Z_k}, R_{Z_{k'}}) \\ &= \frac{P^2}{(P-1)^2} \sum_{k=1}^{P-1} \sum_{k'=1}^{P-1} \frac{1}{P} \sigma^2 + \delta_{kk'} \frac{P-1}{P} \sigma^2 \\ &= 2P\sigma^2.\end{aligned}\quad \text{(true bootstrap readrate variance)}$$

But we want the variance of the difference between two samples from the bootstrap procedure. So, we calculate the covariance between two distinct samples:

$$\begin{aligned}\text{Cov} (\hat{R}, \hat{R}') &= \frac{P^2}{(P-1)^2} \sum_{k=1}^{P-1} \sum_{k'=1}^{P-1} \frac{1}{P} \sigma^2 \\ &= P\sigma^2.\end{aligned}\quad \text{(covariance between samples of } \hat{P}\text{)}$$

Therefore, we find that:

$$\begin{aligned}\mathbb{V} [\hat{R} - \hat{R}'] &= 2\mathbb{V} [\hat{R}] - 2\text{Cov} (\hat{R}, \hat{R}') \\ &= 4P\sigma^2 - 2P\sigma^2 \\ &= 2P\sigma^2.\end{aligned}\quad \text{(bootstrap total readrate variance as difference)}$$

1256           In practice, the observed nonzero positions can lead to a bootstrap distribution with variance  
1257 less than its mean (underdispersed). We generally expect readrates to follow a Poisson or negative  
1258 binomial (overdispersed) distribution, so in these cases, we fall back to parametric bootstrapping with  
1259 a Poisson distribution with mean  $P\mu$ . Otherwise, we use the nonparametric bootstrap sampling  
1260 procedure as described above.



1261 **Supplementary Figures**

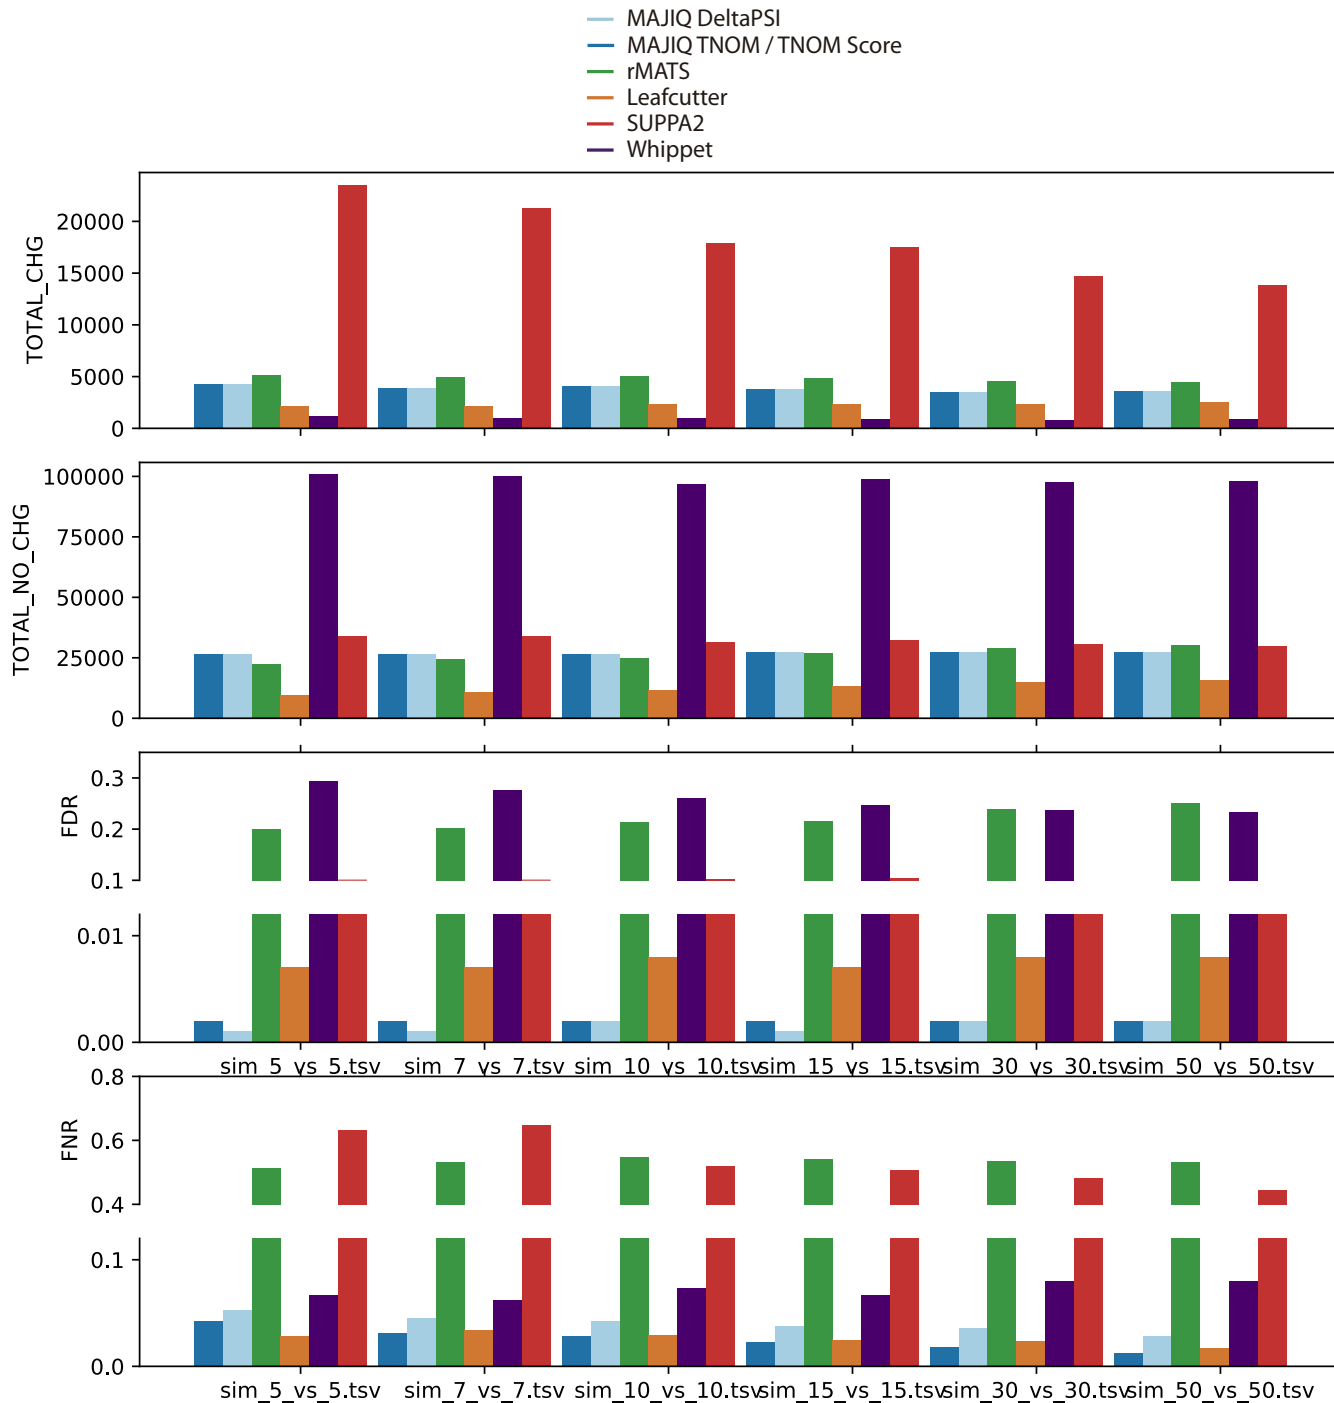

1262 **Fig. S1: Performance evaluation using simulated data at event level.** This figure is equivalent  
 1263 to Fig. 2B in the main text but displays the results when using each method's unique event definition

1264 rather than aggregated at the gene level. For methods that quantify local AS events such as rMATS  
1265 and MAJIQ, the number of changing events is approximately double that of changing genes (2,337 vs  
1266 4,267 for MAJIQ HET), while for LeafCutter, which uses a coarser definition for events based on  
1267 intron clusters, the number of changing events and genes is similar (1,739 vs 2,169).

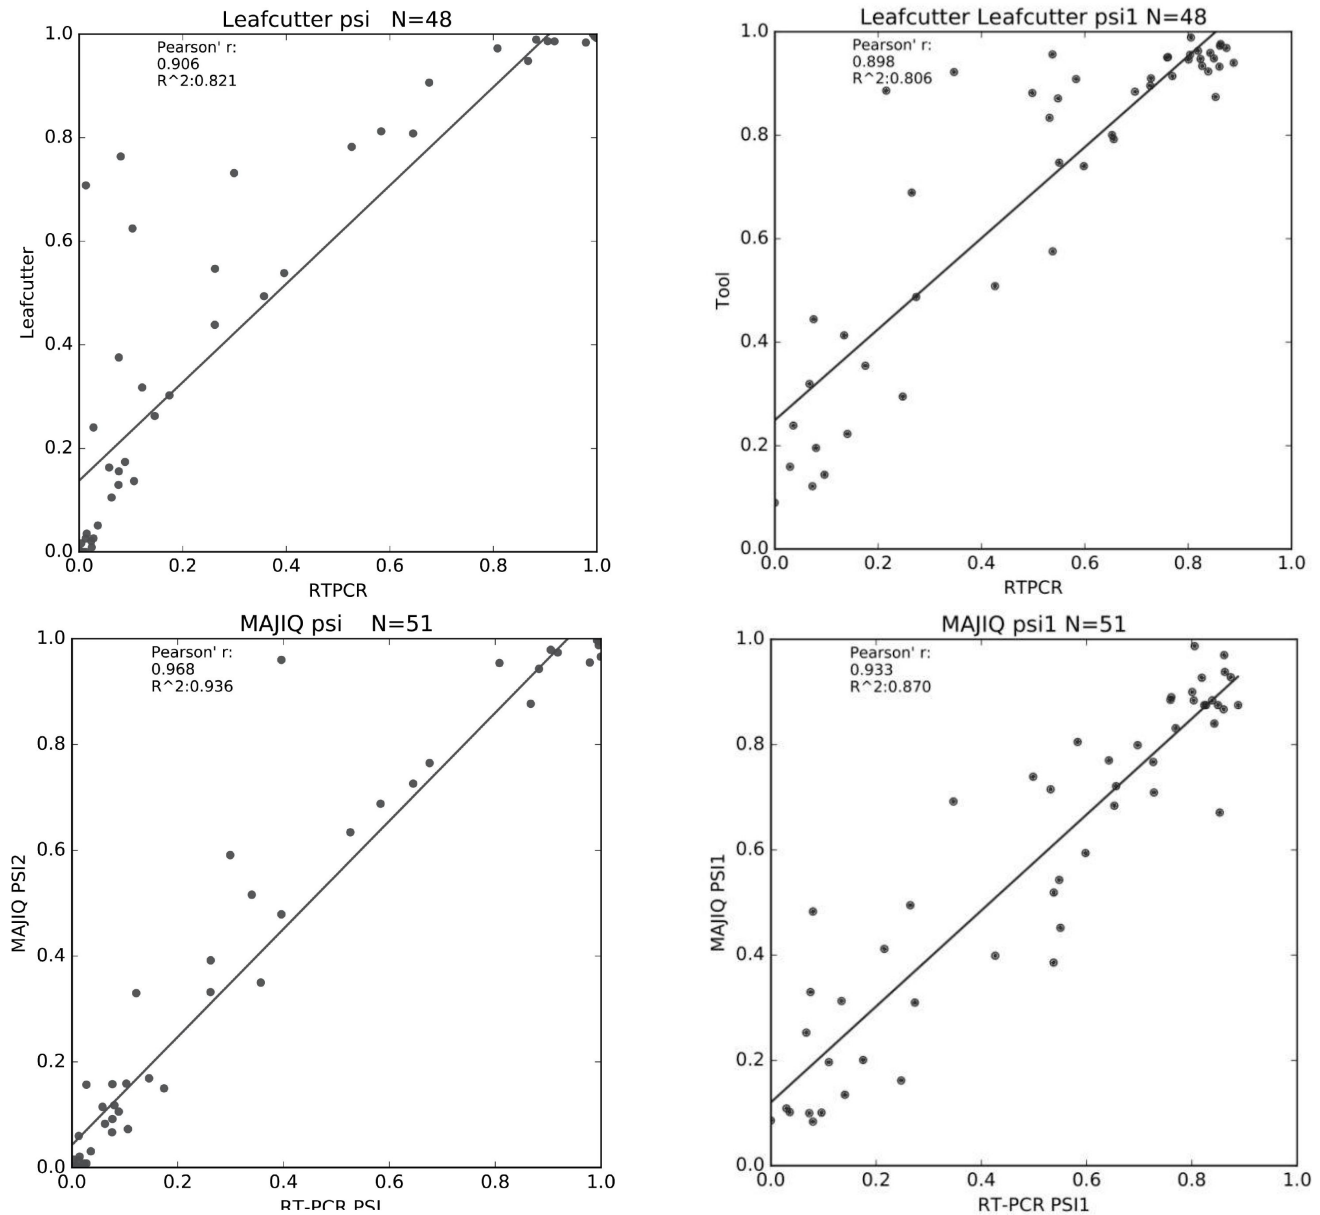

1268 **Fig. S2: Correlation between LeafCutter and MAJIQ quantifications and RT-PCR.** Correlation  
1269 between RNA-seq based quantifications by LeafCutter (top row) or MAJIQ (bottom row) and  
1270 RT-PCR in liver (left) and cerebellum (right). RT-PCR quantifications are from [3] using RNA used  
1271 by [36] to produce the RNA-seq samples. Note that all splicing events shown here were selected by [3]

1272 to be binary, annotated, and changing between the two tissues to allow direct comparison to rMATS.  
1273 The usage of simple binary events allowed us to calibrate LeafCutter's intron cluster quantifications to  
1274 PSI, which is not possible in the general case.

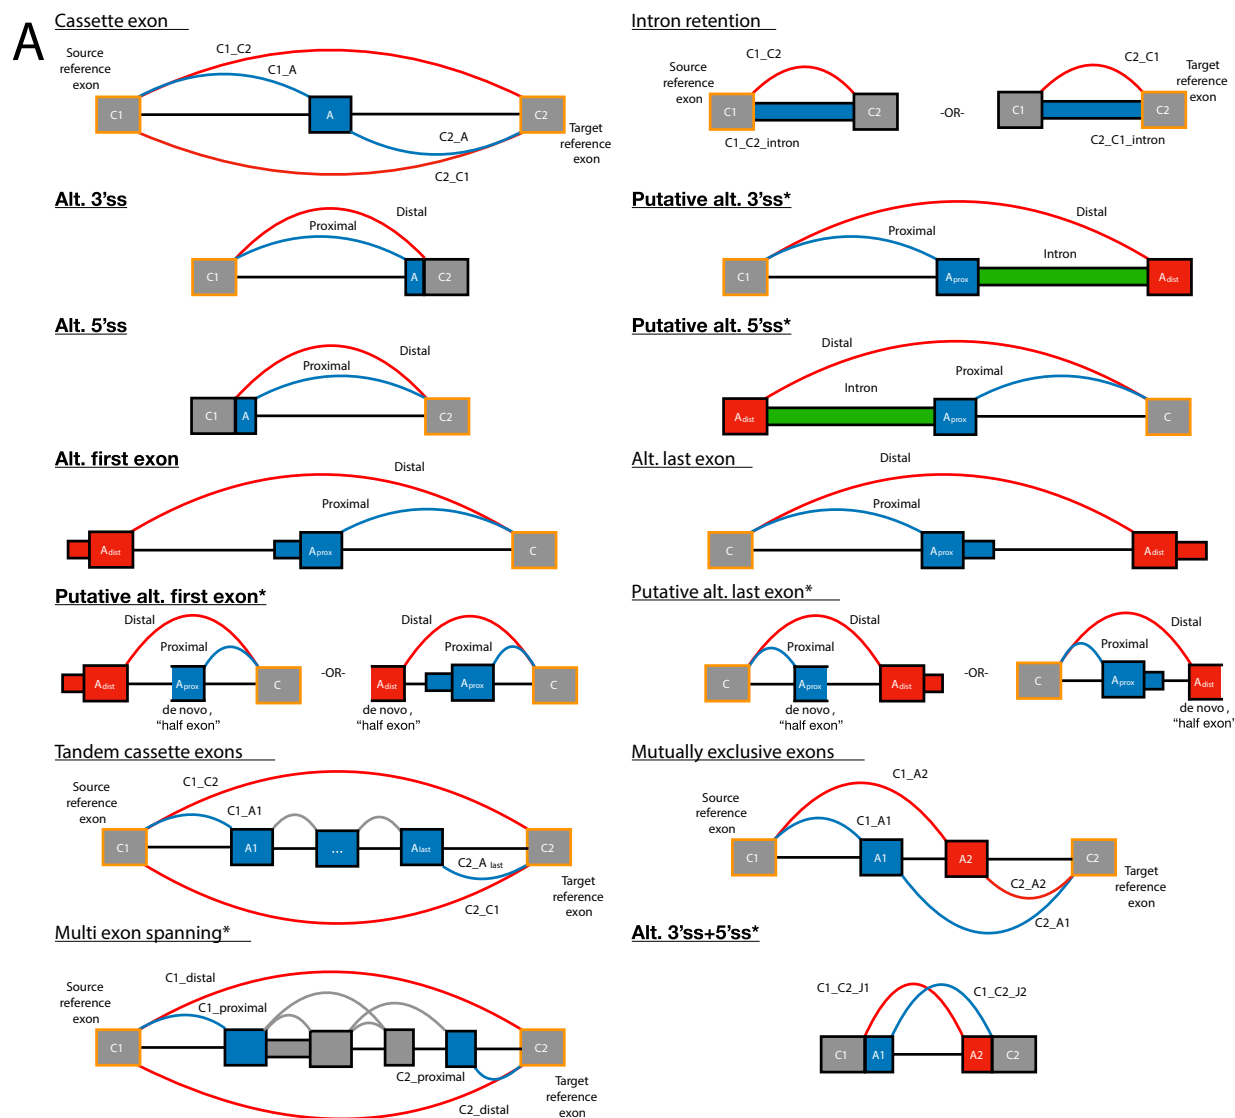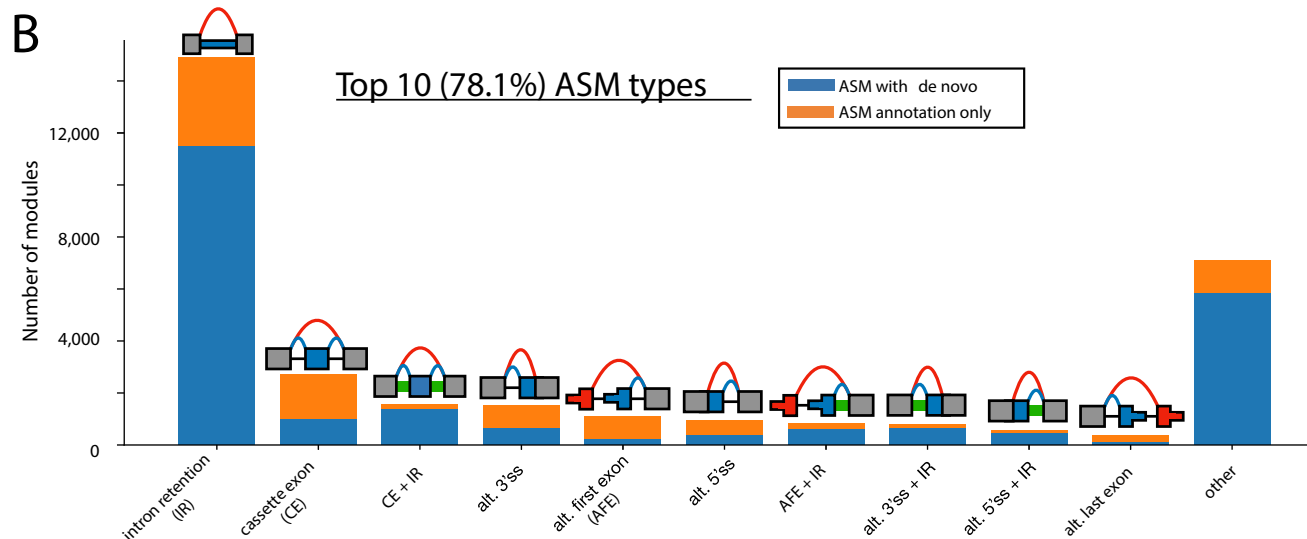

1275 **Fig. S3: VOILA Modulizer AS event types. (A)** Diagrams outlining the structure of alternative  
1276 splicing event (AS event) types used in the VOILA Modulizer. Exons and junctions are labeled in a  
1277 way consistent with the tab separated value text file outputs of the Modulizer. Grey exons outlined in  
1278 orange indicate the reference exon(s) from local splicing variations (LSVs, source and/or target) used  
1279 to create the splicing events. Blue junctions, introns, exons, and exonic regions correspond to inclusion  
1280 products while red corresponds to exclusion products. Grey junctions in tandem cassette exons and  
1281 multi-exon skipping correspond to other junctions present in the splicegraph after simplification, but  
1282 are not directly considered or output by the Modulizer in terms of quantifications. Green introns in  
1283 putative 5' and 3'ss events indicate a retained intron that was quantified to high inclusion, but had the  
1284 corresponding splice junction removed during simplification due to low PSI. This suggests  $A_{prox}$ , the  
1285 intron, and  $A_{dist}$  behave as a single exon unit with the red (intron distal) and blue (intron proximal)  
1286 splice junctions acting as alternative splice sites. Asterisks indicate non-classical AS event types. **(B)**  
1287 Stacked barchart showing the AS event makeup of the top 10 alternative splicing modules (ASMs)  
1288 across the 13 GTEx brain tissue groups from the VOILA Modulizer after applying a 5% PSI  
1289 simplification threshold (e.g. junctions with a group median of less than 5% in all groups are  
1290 removed). Modules named with a plus sign (e.g. CE + IR) correspond to AS modules made up of  
1291 more than one AS event type (e.g. CE + IR modules were made up of both cassette exon and intron  
1292 retention events). Blue bar regions indicate AS modules that had one or more de novo or unannotated  
1293 junctions, after simplification, while orange regions indicate AS modules consisting of solely annotated  
1294 junctions and/or retained introns.

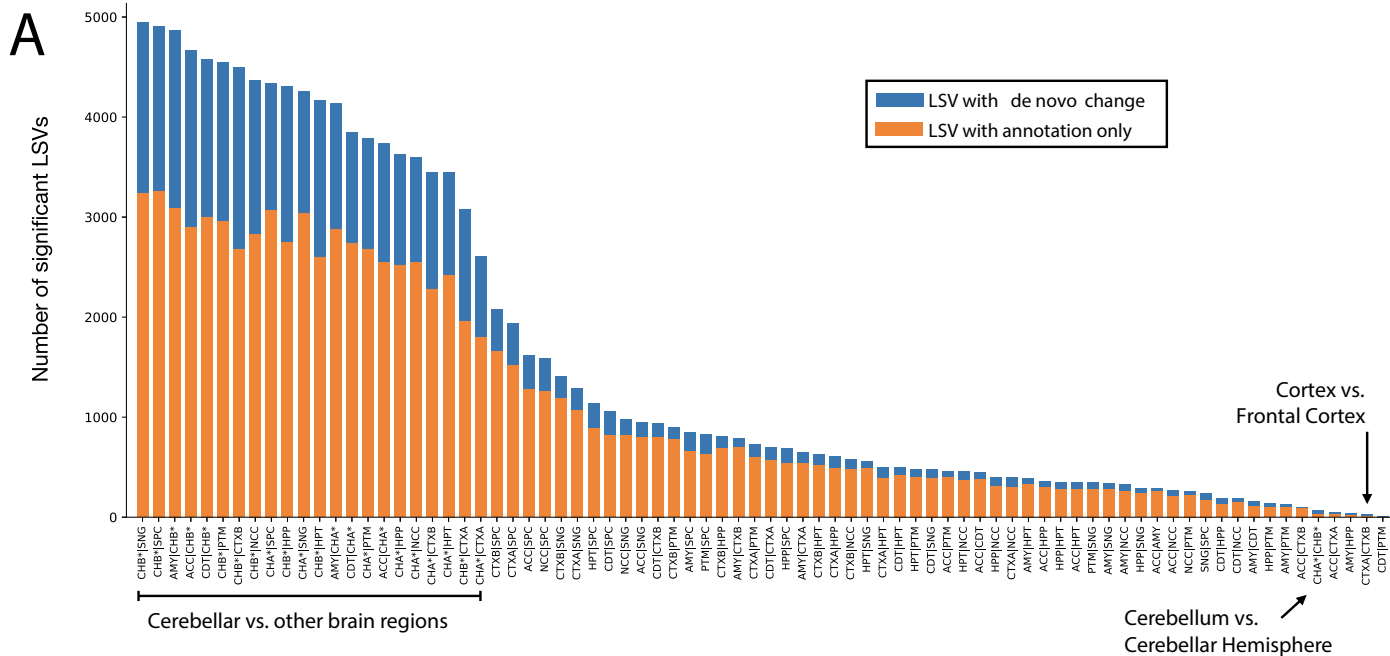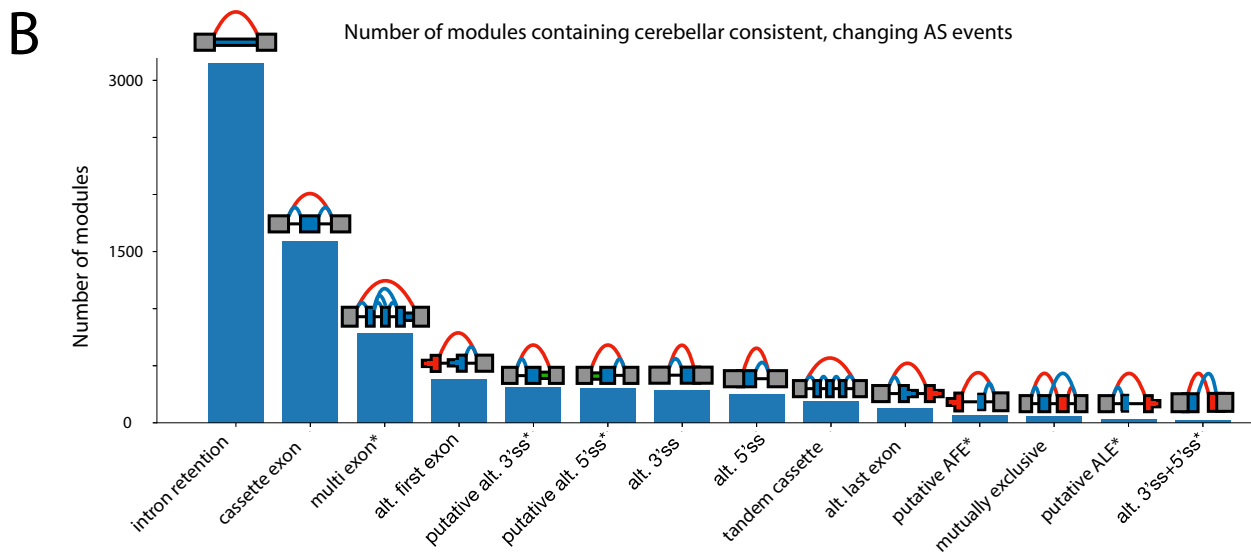

1295 **Fig. S4: Cerebellar vs other brain tissues with LSVs and splicing modules. (A)** Barchart  
1296 showing the number of significant LSVs from 78 pairwise MAJIQ HET comparisons between the 13  
1297 GTEx brain tissue groups. Significant LSVs were those containing at least one junction or intron with  
1298 an absolute difference in group median expected PSI values of 20% between two tissue groups and all  
1299 four HET statistics (Wilcoxon, InfoScore, TNOM, and t-test) with  $p < 0.05$ . Comparisons that include  
1300 a cerebellar tissue (Cerebellum, CHA; or Cerebellar Hemisphere, CHB) are highlighted. Blue indicates  
1301 LSVs containing an unannotated, de novo junction/intron that was changing and orange indicates  
1302 LSVs with only annotated junctions/introns. **(B)** Barchart showing the number of modules containing  
1303 at least one of the 14 alternative splicing event types found to be significantly changing in both  
1304 cerebellar tissues versus one or more other brain subregion tissues in a consistent way (see Methods).  
1305 Event types are outlined in Figure S3A. Non-classical event types are marked with an asterisk.

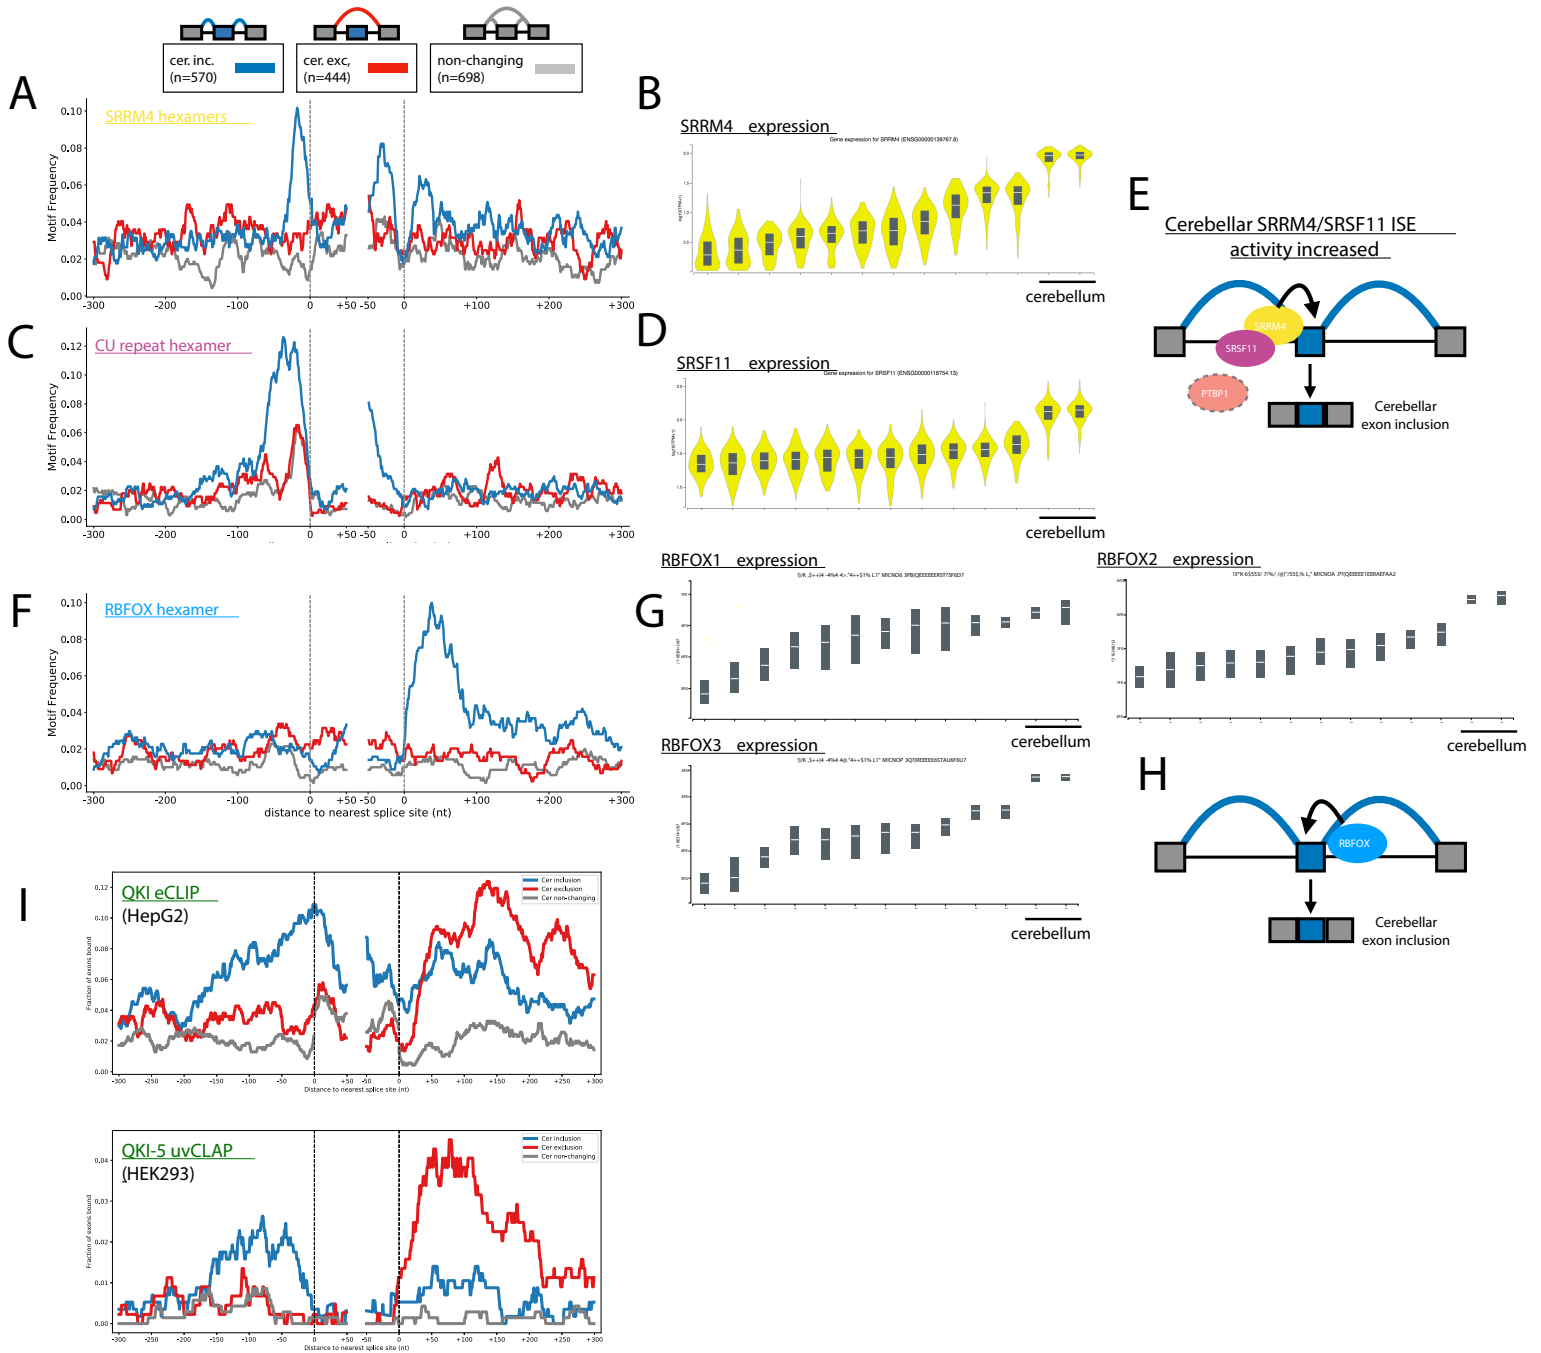



1306 **Fig. S5: motif enrichment and RBP expression for changing and non-changing cassette**  
1307 **exons. (A)** RNAmaps showing the frequency of the top UGC containing SRRS6/nSR100 hexamer  
1308 motifs, as determined by iCLIP (UGCUGC, CUGCUG, GCUGCC, GCUGCU[21]), around cerebellar  
1309 inclusion (blue), exclusion (red), or non-changing (gray) CEs. Frequency was determined by searching  
1310 for motif occurrence over sliding windows of 20 nucleotides with smoothing using a running mean of 5  
1311 nucleotides. **(B)** *SRRS6* bulk tissue gene expression ( $\log_{10}(1 + \text{TPM})$  for ENSG00000139767.8)  
1312 sorted by median brain tissue expression. Chart generated using [GTExportal.org](http://GTExportal.org). **(C)** RNAmaps  
1313 showing the frequency of the top CU-repeat hexamers that bind SRSF11, as determined by iCLIP  
1314 (UCUCUC and CUCUCU[20]), around cerebellar inclusion (blue), exclusion (red), or non-changing  
1315 (gray) CEs. Frequency was determined by searching for motif occurrence over sliding windows of 20  
1316 nucleotides with smoothing using a running mean of 5 nucleotides. **(D)** *SRSF11* bulk tissue gene  
1317 expression ( $\log_{10}(1 + \text{TPM})$  for ENSG00000116754.13) sorted by median brain tissue expression.  
1318 Chart generated using [GTExportal.org](http://GTExportal.org). **(E)** Model for SRRS6/SRSF11 promotion of exon inclusion  
1319 in cerebellar tissues. Increased expression of SRRS6 and SRSF11 increases intronic splicing enhancer  
1320 (ISE) activity by increased binding to CU- and UGC- rich regions just upstream of cerebellar included  
1321 exons. Decreased PTB expression, which also binds CU repeat elements[37], may also contribute to  
1322 increased SRSF11 activity. Model is based on previous work showing cooperative binding and splicing  
1323 enhancement of neuronal microexons by SRSF11 and SRRS6[20]. **(F)** RNAmap showing the frequency  
1324 of the RBFOX hexamer, UGCAUG, around cerebellar inclusion (blue), exclusion (red), or non-changing  
1325 (gray) CEs. Frequency was determined by searching for motif occurrence over sliding windows of 20  
1326 nucleotides with smoothing using a running mean of 5 nucleotides. **(G)** RBFOX family bulk tissue gene  
1327 expression ( $\log_{10}(1 + \text{TPM})$  for *RBFOX1*: ENSG00000078328.19, *RBFOX2*: ENSG00000100320.22,  
1328 and *RBFOX3*: ENSG00000167281.18) sorted by median brain tissue expression. Chart generated using  
1329 [GTExportal.org](http://GTExportal.org). **(H)** Model for position dependent RBFOX regulation in GTEx brain tissues.  
1330 Increased expression of RBFOX family members in cerebellar tissues leads to increased intronic splicing  
1331 enhancer activity (ISE) through increased RBFOX binding downstream of exons, resulting in cerebellar  
1332 exon inclusion (blue), when compared to other brain tissue groups. **(I)** RNAmaps showing the  
1333 frequency of QKI CLIP peak occurrence, indicating *in vivo* binding of QKI around cerebellar inclusion  
1334 (blue), exclusion (red), or non-changing (gray) CEs. Top plot shows the frequency of QKI eCLIP  
1335 peaks in HepG2 cells [34] while bottom shows uvCLAP peak frequencies for the predominantly nuclear

1336 isoform of QKI (QK-5) in HEK293 cells that is thought to regulate splicing[35].

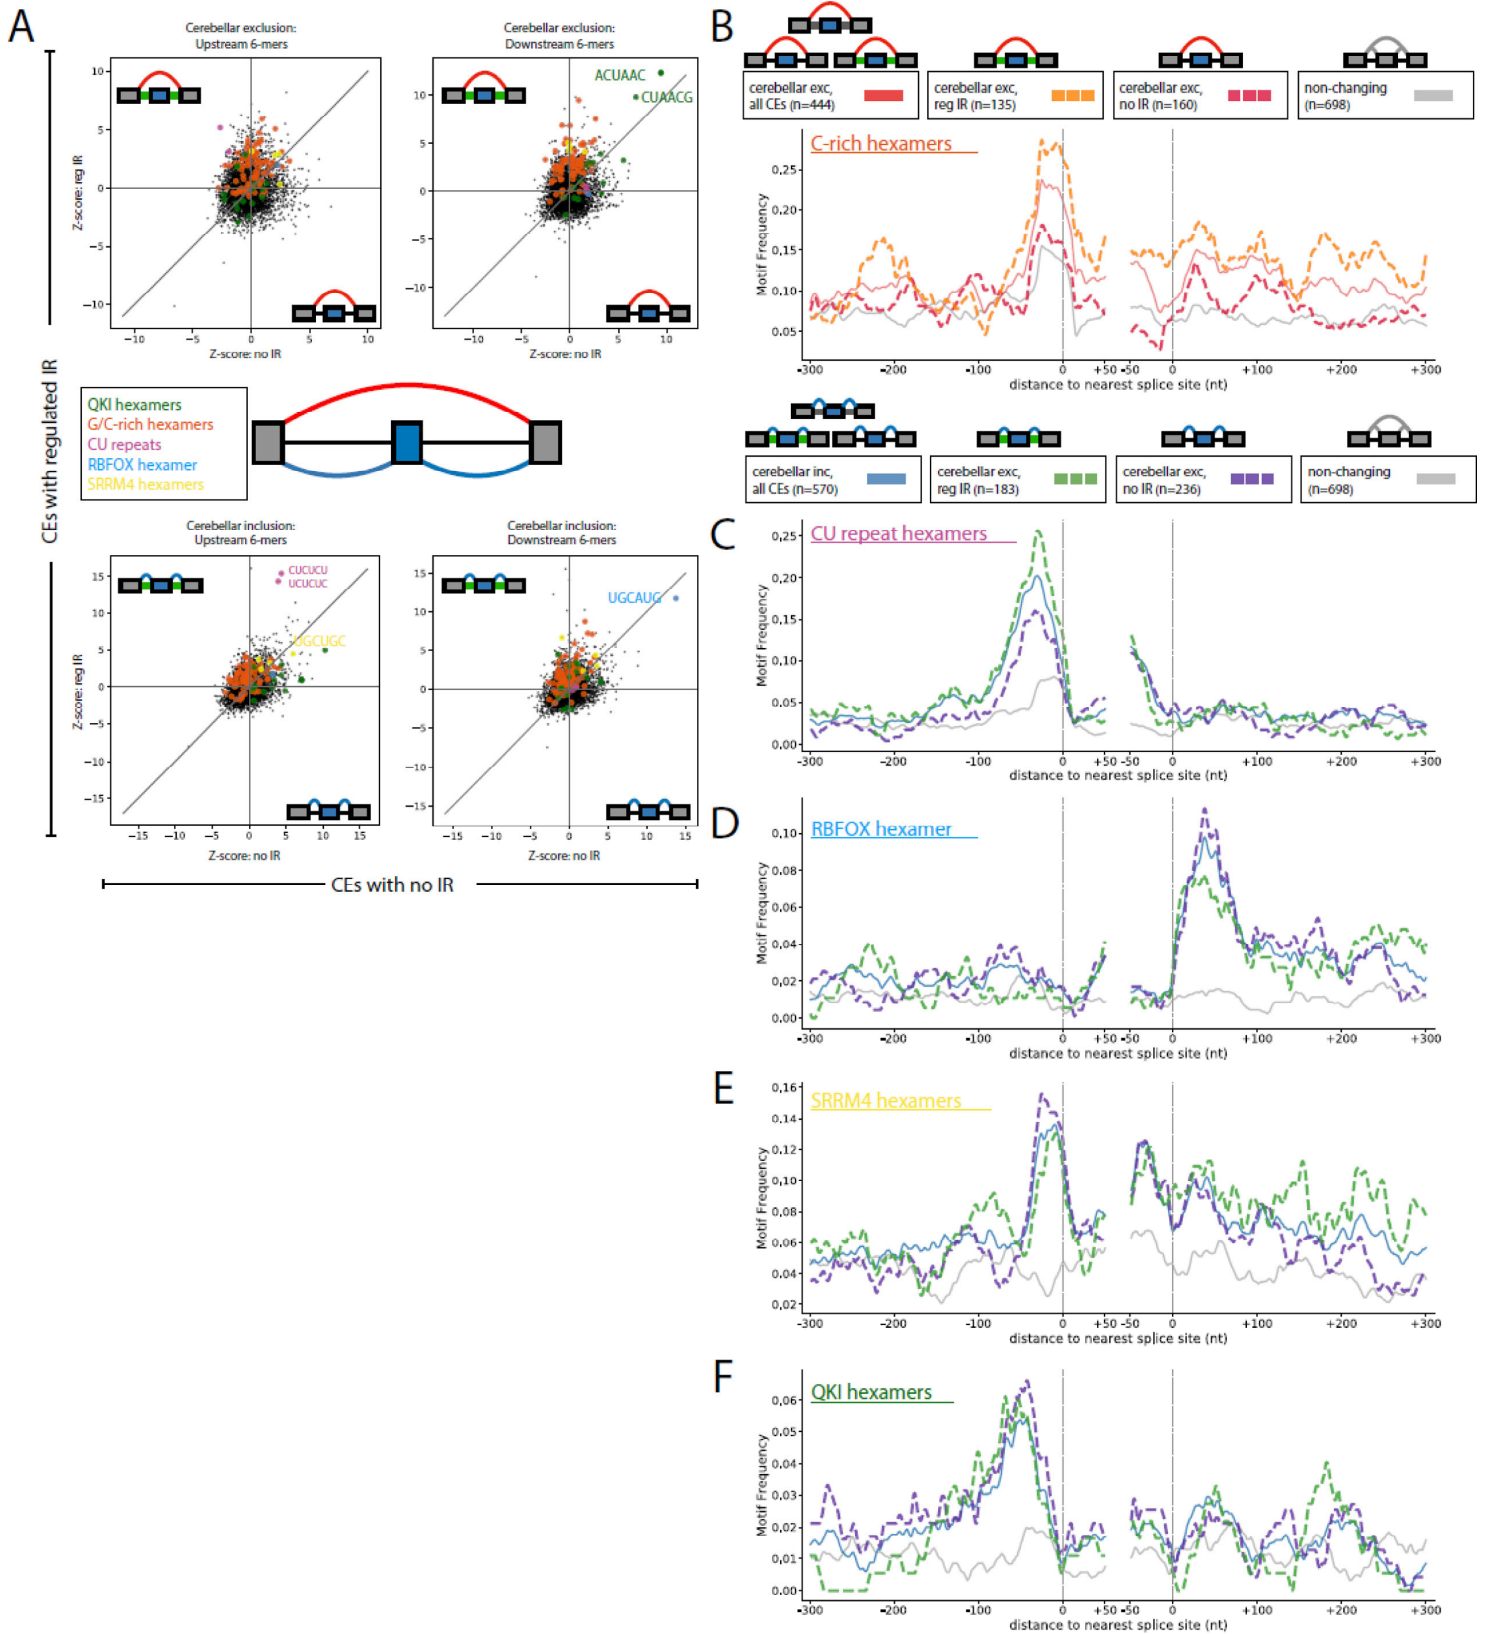

1337 **Fig. S6: Cerebellar cassette exons with and without intron retention. (A)** Scatter plots showing  
1338 hexamer Z-score correspondence between non-overlapping sets of cerebellar cassette exon (CE) sets.  
1339 Each y-axis shows Z-scores from CE events which came from AS modules containing changing intron  
1340 retention (IR) event(s) versus non-changing. Each x-axis shows Z-scores from CE events coming from  
1341 AS modules without IR event(s) detected. Motifs of interest are highlighted according to colors in the  
1342 inset. Top plots show enrichment around cerebellar exclusion event sets while bottom plots show  
1343 enrichment around cerebellar inclusion event sets. Left plots show Z-scores derived from intronic  
1344 regions 300 nucleotides upstream of the 3'ss while right plots show Z-scores derived from intronic  
1345 regions 300 nucleotides downstream of the 5'ss of the cassette exon. All hexamer Z-scores for various  
1346 CE sets are listed in Table S1. **(B)** RNAmaps for C-rich hexamer motif for given sets of cerebellar  
1347 exclusion cassette exon event sets. Lines indicate CE set according to the legend: red, all cerebellar  
1348 exclusion CEs; orange dashed, subset of exclusion CEs which also contained a changing IR event;  
1349 fuchsia dashed, subset of exclusion CEs with no IR event with the AS module; gray, all CEs which  
1350 were not changing between comparisons. Frequency of C-rich hexamers (five of six positions are C and  
1351 contain CCCC) was determined by searching for motif occurrences over sliding windows of 20  
1352 nucleotides with smoothing using a running mean of 5 nucleotides. **(C)** RNAmaps for CU-repeat  
1353 hexamer motifs for given sets of cerebellar inclusion cassette exon event sets. Lines indicate CE set  
1354 according to the legend: blue, all cerebellar inclusion CEs; green dashed, subset of inclusion CEs which  
1355 also contained a changing IR event; purple dashed, subset of inclusion CEs with no IR event with the  
1356 AS module; gray, all CEs which were not changing between comparisons. Frequency of CU-repeat  
1357 hexamers (CUCUCU, UCUCUC) was determined by searching for motif occurrences over sliding  
1358 windows of 20 nucleotides with smoothing using a running mean of 5 nucleotides. **(D)** Same as in  
1359 (C), but shown for RBFOX hexamer (UGCAUG). **(E)** Same as in (C), but shown for SRRS6/nSR100  
1360 iCLIP hexamers (UGCUGC, CUGCUG, GCUGCC, GCUGCU [21]). **(F)** Same as in (C), but shown for  
1361 QKI hexamers (ACUAAY).

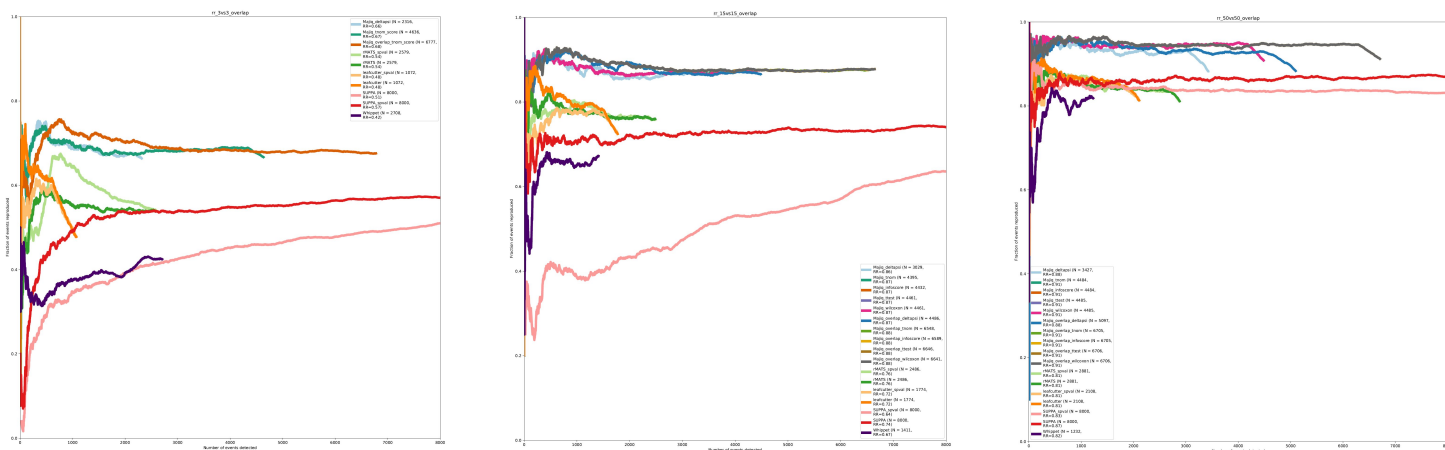

1362 **Fig. S7: Reproducibility ratio plots without filtering MAJIQ overlapping LSVs.** This figure is  
1363 equivalent to Fig. 2D for reproducibility ratio plots in the main text but demonstrates the effect of not  
1364 filtering MAJIQ's list of overlapping LSVs. This filtering, used in Fig. 2D, is done to make the number  
1365 of LSV events comparable to the number of classical splicing events reported by rMATS (see  
1366 Methods). Note that removing the filtering step increases the number of reported differentially spliced  
1367 LSVs by approximately 50% but retains similar reproducibility ratio curves.

## 1368 **Supplementary Tables**

1369 The supplementary tables are provided as an Excel workbook with sheets prefixed by “Table” and  
1370 “README”. The “Table” sheets specify the tables themselves, and for each table, there is a  
1371 corresponding “README” sheet which describes the format/columns of the table.

1372 **Table S1: Hexamer Z scores for cerebellar CE sets** Z-scores calculated for hexamer occurrence  
1373 within 300 nucleotides upstream or downstream of cerebellar cassette exon sets versus a set of  
1374 stringent non-changing cassette exons.

1375 **Table S2: Tool parameters for performance evaluations** The tools, versions, and additional  
1376 parameters used for the performance evaluations.
